# Supplementary material
Source: Research Square preprint supplement (doi:10.21203/rs.3.rs-8434231/v1)
Supplement: Supplementary file 1 [file 1b4b04b9f2b1246bc5cfc20d.xlsx]

## Sheet: Compounds
Name	Formula	Annot. Source: Predicted Compositions	Annot. Source: mzCloud Search	Annot. Source: mzVault Search	Annot. DeltaMass [Da]	Annotation MW	Calc. MW	m/z	RT [min]	# mzVault Results	mzVault Best Match	mzVault Library Match: TCM_All_mzVault_2_3	MS2	Reference Ion	Area: CDE005_ZYKL.raw (F1763)
Curcumenol	C15 H22 O2	Full match	Not the top hit	Full match	-0.00014	234.162	234.162	235.169	17.174	4	95.7	Multiple matches found	DDA for preferred ion	[M+H]+1	6.36067e+09
L-Tryptophan L	C11 H12 N2 O2	Full match	Partial match	Full match	-6e-05	204.09	204.09	188.071	7.402	2	95	Single match found	DDA for preferred ion	[M+H-NH3]+1	6.75367e+09
Nicotinamide	C6 H6 N2 O	Full match	No results	Full match	0.00033	122.048	122.048	123.056	2.329	2	94.8	Single match found	DDA for preferred ion	[M+H]+1	1.317e+09
Rheic acid	C15 H8 O6	Full match	No results	Full match	0.00012	284.032	284.032	283.025	17.575	2	94	Single match found	DDA for preferred ion	[M-H]-1	1.95582e+09
Berberine	C20 H17 N O4	Full match	Full match	Full match	-0.0002	335.116	335.116	336.123	11.491	4	94	Multiple matches found	DDA for preferred ion	[M+H]+1	2.36564e+08
Lactose	C12 H22 O11	No match	No results	Invalid mass	46.0051	342.116	388.121	387.114	1.311	2	93.8	Single match found	DDA for preferred ion	[M-H]-1	7.64871e+08
L-Leucine L	C6 H13 N O2	Full match	Partial match	Full match	7e-05	131.095	131.095	132.102	2.617	2	93.7	Single match found	DDA for preferred ion	[M+H]+1	2.70621e+10
Higenamine	C16 H17 N O3	Full match	No results	Full match	0.00011	271.121	271.121	272.128	7.279	4	93.5	Multiple matches found	DDA for preferred ion	[M+H]+1	1.30923e+08
Isochlorogenic acid B	C25 H24 O12	Not the top hit	No results	Full match	-0.00044	516.127	516.126	515.119	12.394	8	93.4	Multiple matches found	DDA for preferred ion	[M-H]-1	4.86913e+09
Cryptochlorogenic acid	C16 H18 O9	Not the top hit	No results	Full match	-0.00032	354.095	354.095	353.087	9.957	6	93.1	Multiple matches found	DDA for preferred ion	[M-H]-1	1.2116e+10
Gallic acid	C7 H6 O5	No results	No results	Invalid mass	-0.00114	170.022	170.02	169.013	5.225	2	93.1	Single match found	DDA for preferred ion	[M-H]-1	4.62496e+10
Naringenin	C15 H12 O5	Not the top hit	No results	Full match	3e-05	272.068	272.068	271.061	14.382	4	93.1	Multiple matches found	DDA for preferred ion	[M-H]-1	7.79259e+08
1,3-Dicaffeoylquinic acid	C25 H24 O12	Not the top hit	Partial match	Full match	-0.00011	516.127	516.127	517.134	13.225	8	93	Multiple matches found	DDA for preferred ion	[M+H]+1	5.48687e+08
1,3-Dicaffeoylquinic acid	C25 H24 O12	Not the top hit	No results	Full match	-0.00023	516.127	516.127	515.119	10.462	8	92.8	Multiple matches found	DDA for preferred ion	[M-H]-1	3.07566e+09
Chrysophanol	C21 H20 O9	Not the top hit	No results	Full match	0.00029	416.111	416.111	415.104	15.488	6	92.8	Multiple matches found	DDA for preferred ion	[M-H]-1	3.88056e+08
Asperulosidic acid	C18 H24 O12	No match	No results	Invalid mass	17.0267	432.127	449.153	450.161	9.296	2	92.8	Single match found	DDA for preferred ion	[M+H]+1	4.13039e+08
Neochlorogenic acid	C16 H18 O9	Full match	No results	Full match	-0.00042	354.095	354.095	355.102	9.721	8	92.7	Multiple matches found	DDA for preferred ion	[M+H]+1	6.85924e+09
Naringenin	C15 H12 O5	Full match	Partial match	Full match	9e-05	272.068	272.069	273.076	11.925	4	92.5	Multiple matches found	DDA for preferred ion	[M+H]+1	1.28402e+08
Epicatechin	C15 H14 O6	Not the top hit	No results	Full match	0.00014	290.079	290.079	289.072	9.52	6	92.4	Multiple matches found	DDA for preferred ion	[M-H]-1	1.02806e+09
Germacrone	C15 H22 O	Full match	Invalid mass	Full match	-2e-05	218.167	218.167	219.174	18.536	8	92.3	Multiple matches found	DDA for preferred ion	[M+H]+1	2.61837e+09
Nicotinic acid	C6 H5 N O2	Full match	No results	Full match	0.0003	123.032	123.032	124.04	2.185	2	92.3	Single match found	DDA for preferred ion	[M+H]+1	1.60176e+09
Adenine	C5 H5 N5	Full match	No results	Full match	0.0001	135.054	135.055	136.062	1.817	2	92.2	Single match found	DDA for preferred ion	[M+H]+1	2.72002e+09
Azelaic acid	C9 H16 O4	Full match	No results	Full match	-0.00082	188.105	188.104	187.097	13.38	2	92.1	Single match found	DDA for preferred ion	[M-H]-1	2.0021e+09
Paeonol	C9 H10 O3	Full match	No results	Full match	2e-05	166.063	166.063	167.07	14.177	4	92.1	Multiple matches found	DDA for preferred ion	[M+H]+1	9.50571e+08
Protocatechualdehyde	C7 H6 O3	No results	No results	Invalid mass	-0.00126	138.032	138.03	137.023	8.392	6	92.1	Multiple matches found	DDA for preferred ion	[M-H]-1	1.33795e+09
Sucrose	C12 H22 O11	Not the top hit	No results	Full match	-0.00033	342.116	342.116	387.114	1.801	2	92	Single match found	DDA for preferred ion	[M+FA-H]-1	4.78955e+08
α-Cyperone	C15 H22 O	Full match	Invalid mass	Full match	-7e-05	218.167	218.167	219.174	19.408	8	92	Multiple matches found	DDA for preferred ion	[M+H]+1	1.25699e+09
α-Cyperone	C15 H22 O	Full match	Invalid mass	Full match	-5e-05	218.167	218.167	219.174	18.787	8	91.9	Multiple matches found	DDA for preferred ion	[M+H]+1	7.3042e+09
Citric acid	C6 H8 O7	No results	No results	Invalid mass	-60.022	192.027	132.005	191.019	2.775	2	91.9	Single match found	DDA for other ion	[M-H+HAc]-1	4.56831e+10
Sucrose	C12 H22 O11	Not the top hit	No results	Full match	-0.00043	342.116	342.116	377.085	1.465	2	91.8	Single match found	DDA for preferred ion	[M+Cl]-1	1.26662e+10
5-O-Methylvisammioside	C22 H28 O10	Not the top hit	Full match	Full match	-0.00024	452.168	452.168	453.175	13.432	2	91.8	Single match found	DDA for preferred ion	[M+H]+1	1.33937e+08
S-Isocorydine	C20 H23 N O4	Full match	No results	Full match	-9e-05	341.163	341.163	342.17	9.532	6	91.7	Multiple matches found	DDA for preferred ion	[M+H]+1	4.04993e+08
Azelaic acid	C9 H16 O4	Full match	No results	Full match	-0.00072	188.105	188.104	187.097	13.874	2	91.7	Single match found	DDA for preferred ion	[M-H]-1	3.94728e+08
Epicatechin	C15 H14 O6	Full match	No results	Full match	-4e-05	290.079	290.079	289.072	9.048	6	91.7	Multiple matches found	DDA for preferred ion	[M-H]-1	7.65699e+09
Epicatechin	C15 H14 O6	Not the top hit	No results	Full match	0	290.079	290.079	291.086	10.313	6	91.7	Multiple matches found	DDA for preferred ion	[M+H]+1	7.94706e+08
Adenine	C5 H5 N5	Full match	No results	Full match	1e-05	135.054	135.055	136.062	1.513	2	91.6	Single match found	DDA for preferred ion	[M+H]+1	8.362e+08
p-Hydroxy-cinnamic acid	C9 H8 O3	No results	No results	Invalid mass	-0.00102	164.047	164.046	163.039	11.531	4	91.6	Multiple matches found	DDA for preferred ion	[M-H]-1	1.36299e+09
Gentisic acid	C7 H6 O4	No results	No results	Invalid mass	-0.00108	154.027	154.026	153.018	9.192	4	91.5	Multiple matches found	DDA for preferred ion	[M-H]-1	2.60802e+08
Emodin	C15 H10 O5	Full match	Partial match	Full match	-8e-05	270.053	270.053	269.045	18.532	12	91.5	Multiple matches found	DDA for preferred ion	[M-H]-1	6.00297e+09
Albiflorin	C23 H28 O11	Not the top hit	No results	Full match	-0.0001	480.163	480.163	481.17	10.479	2	91.5	Single match found	DDA for preferred ion	[M+H]+1	1.36111e+09
Adenine	C5 H5 N5	No match	No results	Invalid mass	-17.0264	135.054	118.028	136.062	4.643	2	91.4	Single match found	DDA for other ion	[M+NH4]+1	2.14801e+09
Uridine	C9 H12 N2 O6	Full match	Invalid mass	Full match	-6e-05	244.07	244.069	243.062	3.688	2	91.4	Single match found	DDA for preferred ion	[M-H]-1	7.35126e+08
β-Asarone	C12 H16 O3	Full match	Partial match	Full match	-0.0002	208.11	208.11	209.117	15.717	4	91.4	Multiple matches found	DDA for preferred ion	[M+H]+1	6.03052e+10
Albiflorin	C23 H28 O11	Not the top hit	No results	Full match	-0.00036	480.163	480.163	481.17	12.522	2	91.2	Single match found	DDA for preferred ion	[M+H]+1	4.1826e+09
(+)-Magnoflorine	C20 H23 N O4	Not the top hit	No results	Full match	-0.00022	341.163	341.162	342.17	8.919	10	91.2	Multiple matches found	DDA for preferred ion	[M+H]+1	1.57341e+08
Curcumenol	C15 H22 O2	Full match	Not the top hit	Full match	-0.00027	234.162	234.162	235.169	15.784	4	91.2	Multiple matches found	DDA for preferred ion	[M+H]+1	6.90521e+09
Aloeemodin	C15 H10 O5	Full match	Partial match	Full match	0	270.053	270.053	269.046	12.222	12	91.2	Multiple matches found	DDA for preferred ion	[M-H]-1	1.9664e+08
Camphor	C10 H16 O	Full match	Full match	Full match	0.00011	152.12	152.12	135.117	13.871	2	91.1	Single match found	DDA for preferred ion	[M+H-H2O]+1	8.37632e+08
Guanosine	C10 H13 N5 O5	Full match	No results	Full match	-0.00015	283.092	283.092	284.099	5.346	4	90.9	Multiple matches found	DDA for preferred ion	[M+H]+1	5.12327e+09
7-Methoxycoumarin	C10 H8 O3	Full match	Invalid mass	Full match	4e-05	176.047	176.047	177.055	13.251	4	90.9	Multiple matches found	DDA for preferred ion	[M+H]+1	3.36344e+08
α-Linolenic acid	C18 H30 O2	Full match	Invalid mass	Full match	-0.0002	278.225	278.224	279.232	19.309	2	90.9	Single match found	DDA for preferred ion	[M+H]+1	2.40442e+09
Naringenin	C15 H12 O5	Full match	Partial match	Full match	3e-05	272.068	272.068	273.076	11.661	4	90.9	Multiple matches found	DDA for preferred ion	[M+H]+1	9.90092e+07
Albiflorin	C23 H28 O11	Full match	No results	Full match	-0.00055	480.163	480.163	481.17	10.051	2	90.8	Single match found	DDA for preferred ion	[M+H]+1	7.225e+09
Protocatechualdehyde	C7 H6 O3	No results	No results	Invalid mass	-0.00106	138.032	138.031	137.023	9.103	6	90.8	Multiple matches found	DDA for preferred ion	[M-H]-1	6.28474e+08
Diammonium glycyrrhizinate	C42 H62 O16	No match	No results	Full match	0.00063	822.404	822.404	821.397	18.22	6	90.8	Multiple matches found	DDA for preferred ion	[M-H]-1	4.41702e+07
Asperulosidic acid	C18 H24 O12	Not the top hit	Partial match	Full match	-2e-05	432.127	432.127	431.119	9.281	2	90.7	Single match found	DDA for preferred ion	[M-H]-1	4.27734e+08
Salicylic acid	C7 H6 O3	No results	No results	Invalid mass	-0.00124	138.032	138.03	137.023	12.882	6	90.6	Multiple matches found	DDA for preferred ion	[M-H]-1	2.49032e+09
Chrysophanol	C21 H20 O9	Not the top hit	No results	Full match	6e-05	416.111	416.111	415.103	14.951	6	90.6	Multiple matches found	DDA for preferred ion	[M-H]-1	1.29238e+09
α-Linolenic acid	C18 H30 O2	Full match	Invalid mass	Full match	8e-05	278.225	278.225	279.232	19.882	2	90.6	Single match found	DDA for preferred ion	[M+H]+1	4.8166e+08
Osthole	C15 H16 O3	Full match	No results	Full match	3e-05	244.11	244.11	245.117	17.126	6	90.5	Multiple matches found	DDA for preferred ion	[M+H]+1	9.69077e+07
Paeoniflorin	C23 H28 O11	No match	No results	Invalid mass	17.0258	480.163	497.189	498.196	10.781	2	90.4	Single match found	DDA for preferred ion	[M+H]+1	7.73563e+09
α-Linolenic acid	C18 H30 O2	Full match	Invalid mass	Full match	-0.00022	278.225	278.224	279.232	21.373	2	90.4	Single match found	DDA for preferred ion	[M+H]+1	2.7916e+08
Aloeemodin	C15 H10 O5	Full match	Partial match	Full match	0.00011	270.053	270.053	269.046	16.31	12	90.3	Multiple matches found	DDA for preferred ion	[M-H]-1	6.76847e+08
Protocatechuic acid	C7 H6 O4	No results	No results	Invalid mass	-0.00108	154.027	154.026	153.018	7.89	4	90.2	Multiple matches found	DDA for preferred ion	[M-H]-1	3.18308e+08
Protocatechuic acid	C7 H6 O4	No results	No results	Invalid mass	-0.0011	154.027	154.025	153.018	7.325	4	90.2	Multiple matches found	DDA for preferred ion	[M-H]-1	1.56918e+09
5-Hydroxymethylfurfural	C6 H6 O3	Full match	Invalid mass	Full match	0.00027	126.032	126.032	127.039	5.955	2	90.1	Single match found	DDA for preferred ion	[M+H]+1	1.3693e+09
p-Coumaric acid	C9 H8 O3	No match	No results	Invalid mass	-0.00102	164.047	164.046	163.039	12.065	4	90.1	Multiple matches found	DDA for preferred ion	[M-H]-1	3.03942e+08
Eleutheroside B/Syringin	C17 H24 O9	No match	Invalid mass	Invalid mass	17.0264	372.142	389.168	390.176	9.572	2	90.1	Single match found	DDA for preferred ion	[M+H]+1	8.32614e+07
Rubiadin	C15 H10 O4	Full match	Partial match	Full match	-0.00013	254.058	254.058	253.051	18.838	8	90.1	Multiple matches found	DDA for preferred ion	[M-H]-1	1.19022e+09
Quinic acid	C7 H12 O6	Full match	No results	Full match	-0.00092	192.063	192.062	191.055	9.725	2	90	Single match found	DDA for preferred ion	[M-H]-1	1.63747e+09
(+)-Nootkatone	C15 H22 O	Full match	Invalid mass	Full match	-6e-05	218.167	218.167	219.174	17.9	8	89.9	Multiple matches found	DDA for preferred ion	[M+H]+1	1.98568e+09
Chlorogenic acid	C16 H18 O9	Full match	No results	Full match	-0.00015	354.095	354.095	353.088	7.629	6	89.7	Multiple matches found	DDA for preferred ion	[M-H]-1	2.29263e+09
Cianidanol	C15 H14 O6	Full match	No results	Full match	-0.00016	290.079	290.079	291.086	8.324	6	89.7	Multiple matches found	DDA for preferred ion	[M+H]+1	9.17208e+08
Isoquercitrin	C21 H20 O12	Full match	Partial match	Full match	-0.00029	464.095	464.095	465.102	12.342	4	89.6	Multiple matches found	DDA for preferred ion	[M+H]+1	2.6318e+08
Camphor	C10 H16 O	Full match	Full match	Full match	6e-05	152.12	152.12	135.117	12.656	2	89.5	Single match found	DDA for preferred ion	[M+H-H2O]+1	1.28581e+09
Emodin	C21 H20 O10	Not the top hit	No results	Full match	3e-05	432.106	432.106	431.098	12.228	12	89.3	Multiple matches found	DDA for preferred ion	[M-H]-1	7.11889e+08
Epicatechin	C15 H14 O6	No results	No results	Invalid mass	-37.9561	290.079	252.123	291.086	9.051	6	89.3	Multiple matches found	DDA for other ion	[M+K]+1	7.59125e+09
Hyperoside	C21 H20 O12	Full match	Partial match	Full match	0.00011	464.095	464.096	465.103	13.427	4	89.2	Multiple matches found	DDA for preferred ion	[M+H]+1	2.79873e+08
Cinnamaldehyde	C9 H8 O	Full match	No results	Full match	0	132.058	132.058	133.065	10.049	2	89.2	Single match found	DDA for preferred ion	[M+H]+1	1.6795e+08
Dictamnine	C12 H9 N O2	Full match	No results	Full match	4e-05	199.063	199.063	200.071	12.741	2	89.2	Single match found	DDA for preferred ion	[M+H]+1	1.19814e+08
Ethyl gallate	C9 H10 O5	Full match	No results	Full match	-0.00074	198.053	198.052	197.045	11.024	4	89.1	Multiple matches found	DDA for preferred ion	[M-H]-1	1.61684e+08
Camphor	C10 H16 O	Full match	Full match	Full match	3e-05	152.12	152.12	153.127	11.707	2	89.1	Single match found	DDA for preferred ion	[M+H]+1	4.67427e+08
Morin	C15 H10 O7	Full match	Full match	Full match	-0.00034	302.043	302.042	303.05	12.348	6	88.9	Multiple matches found	DDA for preferred ion	[M+H]+1	3.01829e+08
Adenosine	C10 H13 N5 O4	Full match	No results	Full match	-0.00017	267.097	267.097	268.104	4.64	2	88.8	Single match found	DDA for preferred ion	[M+H]+1	1.25533e+10
Caffeic acid	C9 H8 O4	No results	Partial match	Full match	-0.00064	180.042	180.042	239.056	10.204	4	88.8	Multiple matches found	DDA for preferred ion	[M-H+HAc]-1	2.01416e+09
Acacetin	C16 H12 O5	Full match	Partial match	Full match	0.00021	284.068	284.069	285.076	16.394	20	88.8	Multiple matches found	DDA for preferred ion	[M+H]+1	2.66919e+08
Dictamnine	C12 H9 N O2	Full match	No results	Full match	0.00017	199.063	199.063	200.071	15.288	2	88.7	Single match found	DDA for preferred ion	[M+H]+1	5.65286e+08
Coumarin	C9 H6 O2	No match	No results	Invalid mass	18.0107	146.037	164.047	147.044	4.916	2	88.7	Single match found	DDA for other ion	[M+H-H2O]+1	1.70009e+08
p-Coumaric acid	C9 H8 O3	Full match	Invalid mass	Full match	0.00017	164.047	164.048	182.081	3.084	2	88.7	Single match found	DDA for preferred ion	[M+NH4]+1	5.64391e+09
Sennoside A	C42 H38 O20	No match	No results	Full match	0.0009	862.196	862.197	861.189	13.712	4	88.7	Multiple matches found	DDA for preferred ion	[M-H]-1	3.74207e+07
Benzoylpaeoniflorin	C30 H32 O12	No match	No results	Invalid mass	17.0259	584.189	601.215	602.223	14.5	2	88.6	Single match found	DDA for preferred ion	[M+H]+1	5.68234e+09
Ammothamnine	C15 H24 N2 O2	Full match	Full match	Full match	8e-05	264.184	264.184	265.191	6.516	2	88.6	Single match found	DDA for preferred ion	[M+H]+1	1.16084e+08
1-Caffeoylquinic acid	C16 H18 O9	Full match	No results	Full match	-0.00043	354.095	354.095	353.087	8.155	6	88.5	Multiple matches found	DDA for preferred ion	[M-H]-1	1.00885e+10
Oroxylin A	C16 H12 O5	Full match	Not the top hit	Full match	6e-05	284.068	284.069	285.076	16.677	20	88.4	Multiple matches found	DDA for preferred ion	[M+H]+1	4.05081e+08
Procyanidin B	C30 H26 O12	Full match	No results	Full match	-0.00041	578.142	578.142	579.149	8.296	4	88.4	Multiple matches found	DDA for preferred ion	[M+H]+1	2.34915e+09
Cimifugin	C16 H18 O6	Full match	Full match	Full match	-0.00015	306.11	306.11	307.117	12.748	2	88.4	Single match found	DDA for preferred ion	[M+H]+1	1.42037e+08
L-Phenylalanine L	C9 H11 N O2	Full match	No results	Full match	2e-05	165.079	165.079	166.086	5.314	2	88.3	Single match found	DDA for preferred ion	[M+H]+1	1.43821e+10
Benzoic acid	C7 H6 O2	Full match	No results	Full match	0.00013	122.037	122.037	123.044	9.049	4	88.3	Multiple matches found	DDA for preferred ion	[M+H]+1	1.55407e+08
Scopoletin	C10 H8 O4	Full match	Full match	Full match	4e-05	192.042	192.042	193.05	11.517	10	88.3	Multiple matches found	DDA for preferred ion	[M+H]+1	8.66192e+08
Camphor	C10 H16 O	Full match	Full match	Full match	-5e-05	152.12	152.12	135.117	12.331	2	88.2	Single match found	DDA for preferred ion	[M+H-H2O]+1	1.32412e+09
Oroxylin A	C22 H20 O11	Not the top hit	Partial match	Full match	-7e-05	460.101	460.101	461.108	15.069	4	88.2	Multiple matches found	DDA for preferred ion	[M+H]+1	2.6984e+08
Stachydrine	C7 H13 N O2	Full match	Partial match	Full match	7e-05	143.095	143.095	144.102	1.85	2	88.2	Single match found	DDA for preferred ion	[M+H]+1	1.69424e+09
Protocatechuic acid	C7 H6 O4	No results	No results	Invalid mass	-0.00107	154.027	154.026	153.018	10.218	4	88.1	Multiple matches found	DDA for preferred ion	[M-H]-1	4.76392e+08
Kaempferol	C15 H10 O6	Full match	Partial match	Full match	0.00019	286.048	286.048	285.041	15.297	8	88.1	Multiple matches found	DDA for preferred ion	[M-H]-1	5.30764e+08
Isoquercitrin	C21 H20 O12	Full match	Partial match	Full match	-5e-05	464.095	464.095	465.103	12.906	4	88	Multiple matches found	DDA for preferred ion	[M+H]+1	1.52661e+09
Atractyloside A	C21 H36 O10	Not the top hit	No results	Full match	0.0001	448.231	448.231	493.229	15.031	2	87.9	Single match found	DDA for other ion	[M+FA-H]-1	1.20438e+09
Benzoylpaeoniflorin	C30 H32 O12	Not the top hit	No results	Full match	-0.00038	584.189	584.189	629.187	14.496	2	87.9	Single match found	DDA for preferred ion	[M+FA-H]-1	5.86326e+09
Rubiadin	C15 H10 O4	Full match	Partial match	Full match	-7e-05	254.058	254.058	255.065	15.582	8	87.9	Multiple matches found	DDA for preferred ion	[M+H]+1	5.78217e+08
2-Pyrrolidinecarboxylic acid L	C5 H9 N O2	Full match	No results	Full match	0.00026	115.063	115.064	116.071	1.4	2	87.8	Single match found	DDA for preferred ion	[M+H]+1	1.30302e+10
Baicalin	C21 H18 O11	Not the top hit	No results	Full match	-0.00014	446.085	446.085	447.092	14.331	4	87.7	Multiple matches found	DDA for preferred ion	[M+H]+1	2.53605e+08
Matrine	C15 H24 N2 O	Full match	No results	Full match	3e-05	248.189	248.189	249.196	5.743	4	87.7	Multiple matches found	DDA for preferred ion	[M+H]+1	6.44127e+08
p-Hydroxybenzaldehyde	C7 H6 O2	Full match	No results	Full match	0.00032	122.037	122.037	123.044	3.098	4	87.6	Multiple matches found	DDA for preferred ion	[M+H]+1	5.77693e+08
Cordycepin	C10 H13 N5 O3	Full match	No results	Full match	-3e-05	251.102	251.102	252.109	4.865	2	87.5	Single match found	DDA for preferred ion	[M+H]+1	7.0202e+08
Stachydrine	C7 H13 N O2	Full match	Partial match	Full match	-1e-05	143.095	143.095	144.102	1.537	2	87.5	Single match found	DDA for preferred ion	[M+H]+1	4.45167e+08
Pyrogallol	C6 H6 O3	No results	No results	Invalid mass	-0.00121	126.032	126.03	125.023	4.109	2	87.5	Single match found	DDA for preferred ion	[M-H]-1	3.96423e+08
Ligustilide	C12 H14 O2	Full match	No results	Full match	3e-05	190.099	190.099	191.107	10.39	4	87.4	Multiple matches found	DDA for preferred ion	[M+H]+1	1.4628e+08
Oxypaeoniflorin	C23 H28 O12	Not the top hit	No results	Full match	-0.00036	496.158	496.158	495.15	9.373	2	87.3	Single match found	DDA for preferred ion	[M-H]-1	4.12524e+09
Astragalin	C21 H20 O11	Full match	Partial match	Full match	9e-05	448.101	448.101	449.108	13.543	8	87.2	Multiple matches found	DDA for preferred ion	[M+H]+1	4.49695e+08
Isorhamnetin	C16 H12 O7	Full match	Partial match	Full match	-6e-05	316.058	316.058	317.066	13.613	4	87.1	Multiple matches found	DDA for preferred ion	[M+H]+1	2.58176e+08
Rubiadin	C15 H10 O4	Full match	Partial match	Full match	-0.00026	254.058	254.058	253.05	15.846	8	87.1	Multiple matches found	DDA for preferred ion	[M-H]-1	1.16293e+09
Protocatechualdehyde	C7 H6 O3	Full match	No results	Full match	4e-05	138.032	138.032	139.039	9.051	2	87.1	Single match found	DDA for preferred ion	[M+H]+1	7.5592e+08
Paeoniflorin	C23 H28 O11	Not the top hit	No results	Full match	-0.00084	480.163	480.162	525.16	10.812	2	87	Single match found	DDA for preferred ion	[M+FA-H]-1	3.28455e+10
L-Glutamic acid L	C5 H9 N O4	No results	No results	Invalid mass	-0.0008	147.053	147.052	146.045	1.271	2	87	Single match found	DDA for preferred ion	[M-H]-1	7.91582e+07
Oxypaeoniflorin	C23 H28 O12	No match	No results	Invalid mass	17.0265	496.158	513.185	514.192	9.375	2	86.9	Single match found	DDA for preferred ion	[M+H]+1	1.31753e+09
Guanine	C5 H5 N5 O	No match	No results	Invalid mass	-17.0266	151.049	134.023	152.057	5.346	2	86.9	Single match found	DDA for other ion	[M+NH4]+1	5.17629e+09
Guanine	C5 H5 N5 O	Full match	No results	Full match	5e-05	151.049	151.049	152.057	1.905	2	86.9	Single match found	DDA for preferred ion	[M+H]+1	4.64973e+08
Procyanidin B	C30 H26 O12	Not the top hit	No results	Full match	0.00016	578.142	578.143	577.135	9.068	4	86.9	Multiple matches found	DDA for preferred ion	[M-H]-1	3.74229e+08
Fraxinol	C11 H10 O5	Full match	Partial match	Full match	-4e-05	222.053	222.053	223.06	12.063	4	86.9	Multiple matches found	DDA for preferred ion	[M+H]+1	1.31091e+08
Narcissoside	C28 H32 O16	Not the top hit	Partial match	Full match	-0.00024	624.169	624.169	625.176	13.664	4	86.8	Multiple matches found	DDA for preferred ion	[M+H]+1	2.02808e+08
Oxypaeoniflorin	C23 H28 O12	Not the top hit	No results	Full match	2e-05	496.158	496.158	495.151	9.815	2	86.8	Single match found	DDA for preferred ion	[M-H]-1	5.35368e+08
Parthenolide	C15 H20 O3	Full match	Full match	Full match	-8e-05	248.141	248.141	249.148	13.297	8	86.7	Multiple matches found	DDA for preferred ion	[M+H]+1	3.30487e+08
Emodin	C21 H20 O10	Full match	No results	Full match	-0.00018	432.106	432.105	431.098	15.117	12	86.7	Multiple matches found	DDA for preferred ion	[M-H]-1	1.74922e+09
(-)-Epicatechin gallate	C22 H18 O10	Not the top hit	No results	Full match	-4e-05	442.09	442.09	441.083	11.207	4	86.6	Multiple matches found	DDA for preferred ion	[M-H]-1	9.74375e+08
Procyanidin B	C30 H26 O12	No results	No results	Invalid mass	-37.9561	578.142	540.186	577.135	8.303	4	86.6	Multiple matches found	DDA for other ion	[M-2H+K]-1	2.1877e+09
Emodin	C21 H20 O10	Not the top hit	No results	Full match	-4e-05	432.106	432.106	431.098	14.112	12	86.5	Multiple matches found	DDA for preferred ion	[M-H]-1	8.71182e+08
α-Asarone	C12 H16 O3	No match	Invalid mass	Invalid mass	-32.0262	208.11	176.084	209.117	9.411	4	86.4	Multiple matches found	DDA for other ion	[M+H+MeOH]+1	1.67298e+08
Rubiadin	C15 H10 O4	Full match	Partial match	Full match	-0.00018	254.058	254.058	253.05	14.949	8	86.4	Multiple matches found	DDA for preferred ion	[M-H]-1	7.77129e+08
Kaempferol	C27 H30 O15	No match	Invalid mass	Invalid mass	-60.021	594.158	534.137	593.151	13.552	10	86.3	Multiple matches found	DDA for other ion	[M-H+HAc]-1	6.3063e+07
Quinic acid	C7 H12 O6	Full match	No results	Full match	-0.00084	192.063	192.063	191.055	7.63	2	86.2	Single match found	DDA for preferred ion	[M-H]-1	7.61848e+08
2-Adamantanone	C10 H14 O	Full match	No results	Full match	8e-05	150.104	150.105	151.112	9.78	4	85.9	Multiple matches found	DDA for preferred ion	[M+H]+1	2.64544e+08
Protocatechualdehyde	C7 H6 O3	Full match	No results	Full match	3e-05	138.032	138.032	139.039	8.393	2	85.8	Single match found	DDA for preferred ion	[M+H]+1	2.18995e+08
Oroxylin A	C16 H12 O5	Full match	Not the top hit	Full match	-0.00016	284.068	284.068	285.076	15.867	20	85.7	Multiple matches found	DDA for preferred ion	[M+H]+1	5.86252e+08
Morin	C15 H10 O7	Full match	Full match	Full match	-0.00019	302.043	302.042	303.05	12.899	6	85.7	Multiple matches found	DDA for preferred ion	[M+H]+1	6.76761e+08
Methyl gallate	C8 H8 O5	Full match	No results	Full match	-0.00086	184.037	184.036	183.029	8.522	2	85.7	Single match found	DDA for preferred ion	[M-H]-1	1.74122e+08
Procyanidin B	C30 H26 O12	Not the top hit	No results	Full match	-2e-05	578.142	578.142	577.136	10.046	4	85.5	Multiple matches found	DDA for preferred ion	[M-H]-1	2.02934e+08
Oroxylin A	C16 H12 O5	Full match	Not the top hit	Full match	-0.00012	284.068	284.068	285.076	15.676	20	85.5	Multiple matches found	DDA for preferred ion	[M+H]+1	2.40455e+08
Rutin	C27 H30 O16	Not the top hit	Partial match	Full match	-0.00027	610.153	610.153	609.146	12.906	4	85.3	Multiple matches found	DDA for preferred ion	[M-H]-1	2.85964e+08
Taxifolin	C15 H12 O7	Not the top hit	No results	Full match	0.00011	304.058	304.058	303.051	11.702	2	85.3	Single match found	DDA for preferred ion	[M-H]-1	1.95362e+08
Isomeranzin	C15 H16 O4	Full match	Invalid mass	Full match	0.00011	260.105	260.105	261.112	13.834	4	85.3	Multiple matches found	DDA for preferred ion	[M+H]+1	4.67802e+07
Atractylenolide I	C15 H18 O2	No match	No match	Invalid mass	18.0105	230.131	248.141	249.148	14.388	6	84.9	Multiple matches found	DDA for other ion	[M+H]+1	5.19443e+08
Cinnamaldehyde	C9 H8 O	Full match	No results	Full match	9e-05	132.058	132.058	133.065	12.527	2	84.9	Single match found	DDA for preferred ion	[M+H]+1	4.31653e+08
Deacetylasperulosidic acid	C16 H22 O11	No match	No results	Invalid mass	17.0264	390.116	407.143	408.15	4.92	2	84.8	Single match found	DDA for preferred ion	[M+H]+1	9.70273e+08
Corilagin	C27 H22 O18	Not the top hit	No results	Full match	3e-05	634.081	634.081	633.073	7.766	2	84.8	Single match found	DDA for preferred ion	[M-H]-1	1.93565e+08
Acacetin	C16 H12 O5	Full match	Partial match	Full match	0.00016	284.068	284.069	285.076	19.787	20	84.8	Multiple matches found	DDA for preferred ion	[M+H]+1	2.04843e+08
4-Methyl-6,7-dihydroxycoumarin	C10 H8 O4	Full match	Invalid mass	Full match	-2e-05	192.042	192.042	225.076	7.779	10	84.7	Multiple matches found	DDA for preferred ion	[M+H+MeOH]+1	2.85969e+08
3,5-Dimethoxy-4-hydroxybenzaldehyde	C9 H10 O4	Full match	No results	Full match	-0.00036	182.058	182.058	183.065	11.016	4	84.5	Multiple matches found	DDA for preferred ion	[M+H]+1	1.23726e+08
p-Hydroxybenzaldehyde	C7 H6 O2	No results	No results	Invalid mass	-0.00137	122.037	122.035	121.028	9.732	2	84.5	Single match found	DDA for preferred ion	[M-H]-1	3.49928e+08
Kaempferol	C15 H10 O6	Full match	Partial match	Full match	-0.00024	286.048	286.048	287.055	15.695	8	84.4	Multiple matches found	DDA for preferred ion	[M+H]+1	7.21001e+08
Wilforlide A	C30 H46 O3	Full match	Partial match	Full match	0.00011	454.345	454.345	437.341	19.642	12	84.3	Multiple matches found	DDA for preferred ion	[M+H-H2O]+1	5.04081e+07
Scutellarein	C15 H10 O6	Full match	No results	Full match	0.0001	286.048	286.048	285.041	22.566	8	84.3	Multiple matches found	DDA for preferred ion	[M-H]-1	4.72209e+08
Morin	C15 H10 O7	Full match	Full match	Full match	-0.00012	302.043	302.043	303.05	13.404	6	84.2	Multiple matches found	DDA for preferred ion	[M+H]+1	2.22947e+08
Vanillin	C8 H8 O3	Full match	Invalid mass	Full match	7e-05	152.047	152.047	153.055	10.584	8	84.2	Multiple matches found	DDA for preferred ion	[M+H]+1	3.32408e+08
Gardenoside	C17 H24 O11	No match	No results	Full match	-0.0001	404.132	404.132	403.124	7.341	4	84.1	Multiple matches found	DDA for preferred ion	[M-H]-1	2.70073e+08
Quinic acid	C7 H12 O6	No results	No results	Invalid mass	-0.00102	192.063	192.062	191.055	8.156	2	84.1	Single match found	DDA for preferred ion	[M-H]-1	4.93217e+08
Atractylenolide II	C15 H20 O2	Full match	Invalid mass	Full match	-3e-05	232.146	232.146	233.154	15.107	4	84	Multiple matches found	DDA for preferred ion	[M+H]+1	7.00326e+08
18 β-Glycyrrhetintic Acid	C30 H46 O4	No match	Invalid mass	Invalid mass	18.011	470.34	488.351	471.347	19.912	2	84	Single match found	DDA for other ion	[M+H-H2O]+1	2.5132e+08
Asiatic acid	C30 H48 O5	Not the top hit	Full match	Full match	0.00034	488.35	488.351	511.34	18.123	4	84	Multiple matches found	DDA for preferred ion	[M+Na]+1	1.44149e+08
Baicalein	C15 H10 O5	Full match	Partial match	Full match	-0.00019	270.053	270.053	271.06	15.686	10	83.8	Multiple matches found	DDA for preferred ion	[M+H]+1	2.61143e+08
2-Hydroxy-4-methoxybenzaldehyde	C8 H8 O3	Full match	Invalid mass	Full match	-4e-05	152.047	152.047	153.055	15.863	8	83.7	Multiple matches found	DDA for preferred ion	[M+H]+1	5.93019e+08
Glycitein	C16 H12 O5	No match	Invalid mass	Invalid mass	-60.0211	284.068	224.047	283.061	15.877	16	83.7	Multiple matches found	DDA for other ion	[M-H+HAc]-1	2.22721e+08
Isoliquiritin	C21 H22 O9	Full match	Partial match	Full match	-0.00043	418.126	418.126	419.133	12.94	6	83.5	Multiple matches found	DDA for preferred ion	[M+H]+1	1.6347e+09
Purpurin	C14 H8 O5	Full match	No results	Full match	-5e-05	256.037	256.037	255.03	17.574	2	83.4	Single match found	DDA for preferred ion	[M-H]-1	6.73463e+07
Xanthoxyline	C10 H12 O4	Full match	Partial match	Full match	-1e-05	196.074	196.074	197.081	12.524	10	83.2	Multiple matches found	DDA for preferred ion	[M+H]+1	1.13661e+09
p-Coumaric acid	C9 H8 O3	Full match	Invalid mass	Full match	0.00011	164.047	164.047	165.055	9.492	2	83.2	Single match found	DDA for preferred ion	[M+H]+1	1.54618e+08
Hispidulin	C16 H12 O6	No match	No results	Full match	-7e-05	300.063	300.063	301.071	18.829	8	83.2	Multiple matches found	DDA for preferred ion	[M+H]+1	1.3938e+07
Asperuloside	C18 H22 O11	No match	No results	Invalid mass	-14.0154	414.116	400.101	459.115	9.222	2	82.9	Single match found	DDA for other ion	[M-H+HAc]-1	5.65016e+07
Nobiletin	C21 H22 O8	Full match	Invalid mass	Full match	-4e-05	402.131	402.131	403.139	16.741	2	82.9	Single match found	DDA for preferred ion	[M+H]+1	1.09213e+08
Esculetin	C9 H6 O4	Full match	Full match	Full match	5e-05	178.027	178.027	179.034	8.995	6	82.8	Multiple matches found	DDA for preferred ion	[M+H]+1	2.23799e+08
7-Methoxy-4-methylcoumarin	C11 H10 O3	Full match	Invalid mass	Full match	-8e-05	190.063	190.063	191.07	13.749	2	82.8	Single match found	DDA for preferred ion	[M+H]+1	2.26712e+09
Sesamoside	C17 H24 O12	No match	No results	Invalid mass	17.0266	420.127	437.153	438.161	9.189	2	82.7	Single match found	DDA for preferred ion	[M+H]+1	1.15817e+08
Xanthoxyline	C10 H12 O4	Full match	Partial match	Full match	-5e-05	196.074	196.074	197.081	10.319	10	82.6	Multiple matches found	DDA for preferred ion	[M+H]+1	6.61594e+08
Naringin	C27 H32 O14	No match	Full match	Full match	0.00024	580.179	580.179	579.172	12.562	4	82.5	Multiple matches found	DDA for preferred ion	[M-H]-1	5.67515e+07
Glabrolide	C30 H44 O4	Full match	No results	Full match	0.00028	468.324	468.324	469.332	18.282	2	82.5	Single match found	DDA for preferred ion	[M+H]+1	5.97115e+07
Isoscopoletin	C10 H8 O4	Full match	Not the top hit	Full match	0.00024	192.042	192.042	175.039	9.289	10	82.4	Multiple matches found	DDA for preferred ion	[M+H-H2O]+1	1.63058e+08
Ellagic acid	C14 H6 O8	Full match	No results	Full match	0.00016	302.006	302.006	300.999	16.283	2	82.3	Single match found	DDA for preferred ion	[M-H]-1	2.0981e+08
Demethylwedelolactone	C15 H8 O7	Full match	No results	Full match	0.0002	300.027	300.027	299.02	17.553	2	82.3	Single match found	DDA for preferred ion	[M-H]-1	1.38728e+08
Acetophenone	C8 H8 O	Full match	Full match	Full match	0.0004	120.058	120.058	121.065	7.224	2	82.3	Single match found	DDA for preferred ion	[M+H]+1	1.81105e+08
Eriodictyol	C15 H12 O6	Not the top hit	No results	Full match	8e-05	288.063	288.063	287.056	13.574	2	82.3	Single match found	DDA for preferred ion	[M-H]-1	1.48984e+08
Acetophenone	C8 H8 O	Full match	Full match	Full match	0.00025	120.058	120.058	121.065	2.432	2	82.2	Single match found	DDA for preferred ion	[M+H]+1	1.07486e+09
α-Linolenic acid	C18 H30 O2	Full match	Invalid mass	Full match	9e-05	278.225	278.225	279.232	18.26	2	82.1	Single match found	DDA for preferred ion	[M+H]+1	8.29982e+08
4-Methyl-6,7-dihydroxycoumarin	C10 H8 O4	Full match	Invalid mass	Full match	0.0002	192.042	192.042	193.05	4.911	10	82.1	Multiple matches found	DDA for preferred ion	[M+H]+1	3.81922e+08
Baicalein	C15 H10 O5	Full match	Partial match	Full match	-7e-05	270.053	270.053	271.06	15.096	10	81.4	Multiple matches found	DDA for preferred ion	[M+H]+1	1.92023e+08
Echinocystic acid	C30 H48 O4	Full match	Partial match	Full match	0.00031	472.355	472.356	471.348	19.641	2	81.2	Single match found	DDA for preferred ion	[M-H]-1	3.11059e+07
Decursinol	C14 H14 O4	Full match	Full match	Full match	-0.00014	246.089	246.089	247.096	14.231	4	81.1	Multiple matches found	DDA for preferred ion	[M+H]+1	3.41224e+09
Atractylenolide I	C15 H18 O2	Full match	Invalid mass	Full match	6e-05	230.131	230.131	231.138	12.157	6	81.1	Multiple matches found	DDA for preferred ion	[M+H]+1	1.36884e+08
Xanthoxyline	C10 H12 O4	Full match	Partial match	Full match	-0.00012	196.074	196.073	197.081	10.045	10	80.9	Multiple matches found	DDA for preferred ion	[M+H]+1	7.04201e+08
Ferulaldehyde	C10 H10 O3	Full match	Not the top hit	Full match	-3e-05	178.063	178.063	179.07	12.531	4	80.8	Multiple matches found	DDA for preferred ion	[M+H]+1	7.3943e+08
Atractylenolide I	C15 H18 O2	Full match	Invalid mass	Full match	0.00011	230.131	230.131	231.138	17.502	6	80.8	Multiple matches found	DDA for preferred ion	[M+H]+1	2.1636e+08
Tectochrysin	C16 H12 O4	No match	Partial match	Full match	0.00023	268.074	268.074	269.081	16.809	4	80.7	Multiple matches found	DDA for preferred ion	[M+H]+1	2.73935e+08
Rutin	C27 H30 O16	Full match	Partial match	Full match	-0.00021	610.153	610.153	611.16	12.119	4	80.7	Multiple matches found	DDA for preferred ion	[M+H]+1	5.69506e+08
Baicalein	C15 H10 O5	Full match	Partial match	Full match	-0.00013	270.053	270.053	271.06	16.022	10	80.6	Multiple matches found	DDA for preferred ion	[M+H]+1	3.64394e+08
p-Hydroxybenzaldehyde	C7 H6 O2	No results	No results	Invalid mass	-0.00133	122.037	122.035	121.028	12.274	2	80.6	Single match found	DDA for preferred ion	[M-H]-1	1.14214e+09
Inosine	C10 H12 N4 O5	Full match	No results	Full match	-3e-05	268.081	268.081	269.088	5.352	2	80.5	Single match found	DDA for preferred ion	[M+H]+1	1.15793e+08
1,2,3,4,6-Pentagalloylglucose	C41 H32 O26	No match	No results	Full match	0.00061	940.118	940.119	939.112	12.06	2	80.5	Single match found	DDA for preferred ion	[M-H]-1	1.08801e+09
Parthenolide	C15 H20 O3	Full match	Full match	Full match	-0.00018	248.141	248.141	249.148	12.856	8	80.5	Multiple matches found	DDA for preferred ion	[M+H]+1	3.19693e+08
L-Glutamic acid L	C5 H9 N O4	Full match	No results	Full match	4e-05	147.053	147.053	148.06	1.624	2	80.5	Single match found	DDA for preferred ion	[M+H]+1	1.63764e+08
Demethoxyyangonin	C14 H12 O3	No match	Invalid mass	Invalid mass	-32.0263	228.079	196.052	229.086	14.273	4	80.3	Multiple matches found	DDA for other ion	[M+H+MeOH]+1	2.4272e+08
4-Methyl-6,7-dihydroxycoumarin	C10 H8 O4	Full match	Invalid mass	Full match	0.00019	192.042	192.042	175.039	6.531	10	80.3	Multiple matches found	DDA for preferred ion	[M+H-H2O]+1	5.46613e+08
Arglabin	C15 H18 O3	Full match	Not the top hit	Full match	0	246.126	246.126	247.133	13.675	2	80.2	Single match found	DDA for preferred ion	[M+H]+1	8.81748e+08
Nepodin	C13 H12 O3	Full match	No results	Full match	0.00011	216.079	216.079	217.086	8.475	2	80	Single match found	DDA for preferred ion	[M+H]+1	1.21851e+08
Echinocystic acid	C30 H48 O4	Full match	Partial match	Full match	0.00025	472.355	472.356	455.352	19.886	2	79.9	Single match found	DDA for preferred ion	[M+H-H2O]+1	1.61627e+08
Naringenin chalcone	C15 H12 O5	Not the top hit	No results	Full match	9e-05	272.068	272.069	273.076	14.911	4	79.9	Multiple matches found	DDA for preferred ion	[M+H]+1	1.68249e+08
Tinnevellin glucoside	C20 H24 O9	Full match	Partial match	Full match	-0.00023	408.142	408.142	409.149	14.712	4	79.8	Multiple matches found	DDA for preferred ion	[M+H]+1	2.57868e+08
Glabrolide	C30 H44 O4	Not the top hit	No results	Full match	3e-05	468.324	468.324	469.331	20.305	2	79.6	Single match found	DDA for preferred ion	[M+H]+1	8.34974e+07
Scopoletin	C10 H8 O4	Full match	Full match	Full match	0.00028	192.042	192.043	193.05	12.051	10	79.5	Multiple matches found	DDA for preferred ion	[M+H]+1	1.7765e+08
Coumarin	C9 H6 O2	Full match	No results	Full match	6e-05	146.037	146.037	147.044	9.49	2	79.5	Single match found	DDA for preferred ion	[M+H]+1	1.744e+08
Parthenolide	C15 H20 O3	Full match	Full match	Full match	-0.00026	248.141	248.141	249.148	14.559	8	79.2	Multiple matches found	DDA for preferred ion	[M+H]+1	1.83468e+09
Vicenin II	C27 H30 O15	Full match	Partial match	Full match	-0.00075	594.158	594.158	593.15	10.937	10	79.1	Multiple matches found	DDA for preferred ion	[M-H]-1	2.76537e+08
4-Methoxyphenylacetic acid	C9 H10 O3	No match	No results	Invalid mass	-0.00108	166.063	166.062	165.055	9.674	2	79	Single match found	DDA for preferred ion	[M-H]-1	9.19083e+07
Hastatoside	C17 H24 O11	No match	No results	Invalid mass	46.0052	404.132	450.137	449.13	8.165	2	78.9	Single match found	DDA for preferred ion	[M-H]-1	1.17266e+08
Benzoic acid	C7 H6 O2	Full match	No results	Full match	0.00035	122.037	122.037	123.044	11.307	4	78.9	Multiple matches found	DDA for preferred ion	[M+H]+1	1.23007e+08
Hordenine	C10 H15 N O	No match	No results	Invalid mass	-32.0261	165.115	133.089	166.123	6.171	4	78.8	Multiple matches found	DDA for other ion	[M+H+MeOH]+1	2.22656e+07
Protocatechuic acid	C7 H6 O4	No results	No results	Invalid mass	-0.00109	154.027	154.026	153.018	12.613	4	78.7	Multiple matches found	DDA for preferred ion	[M-H]-1	4.96204e+09
Hordenine	C10 H15 N O	Full match	No results	Full match	7e-05	165.115	165.115	166.123	5.927	4	78.4	Multiple matches found	DDA for preferred ion	[M+H]+1	2.27906e+07
Artemisinic acid	C15 H22 O2	Full match	Not the top hit	Full match	-5e-05	234.162	234.162	235.169	13.836	4	78.2	Multiple matches found	DDA for preferred ion	[M+H]+1	8.81414e+08
Cinnamaldehyde	C9 H8 O	Full match	No results	Full match	0.00023	132.058	132.058	133.065	6.074	2	77.8	Single match found	DDA for preferred ion	[M+H]+1	2.53769e+08
Isoalantolactone	C15 H20 O2	Full match	Invalid mass	Full match	5e-05	232.146	232.146	233.154	13.529	4	77.8	Multiple matches found	DDA for preferred ion	[M+H]+1	4.87121e+08
Coumarin	C9 H6 O2	Full match	No results	Full match	3e-05	146.037	146.037	147.044	8.58	2	77.7	Single match found	DDA for preferred ion	[M+H]+1	2.81426e+08
Ferulic acid	C10 H10 O4	Full match	Partial match	Full match	0.00024	194.058	194.058	195.065	9.19	4	77.5	Multiple matches found	DDA for preferred ion	[M+H]+1	1.0529e+08
Luteolin	C15 H10 O6	Not the top hit	Partial match	Full match	-8e-05	286.048	286.048	287.055	18.829	8	77.4	Multiple matches found	DDA for preferred ion	[M+H]+1	1.39364e+08
7-Hydroxycoumarin	C9 H6 O3	Full match	Invalid mass	Full match	4e-05	162.032	162.032	163.039	18.382	2	77.2	Single match found	DDA for preferred ion	[M+H]+1	7.18875e+08
Fraxetin	C10 H8 O5	Full match	No results	Full match	-0.00054	208.037	208.037	207.029	10.744	2	77	Single match found	DDA for preferred ion	[M-H]-1	8.44124e+07
Liquiritigenin	C15 H12 O4	Full match	Not the top hit	Full match	-0.0007	256.074	256.073	257.08	12.94	6	77	Multiple matches found	DDA for preferred ion	[M+H]+1	8.36663e+07
Liquiritigenin	C15 H12 O4	Full match	Partial match	Full match	-0.00014	256.074	256.073	257.081	14.673	6	77	Multiple matches found	DDA for preferred ion	[M+H]+1	3.74037e+08
Homoplantaginin	C22 H22 O11	Not the top hit	Not the top hit	Full match	-0.00032	462.116	462.116	463.123	12.76	6	77	Multiple matches found	DDA for preferred ion	[M+H]+1	4.98813e+08
5-Hydroxy-1-tetralone	C10 H10 O2	No match	No results	Invalid mass	-32.0261	162.068	130.042	163.075	8.472	2	76.6	Single match found	DDA for other ion	[M+H+MeOH]+1	1.03394e+08
Atractylenolide I	C15 H18 O2	Full match	Invalid mass	Full match	7e-05	230.131	230.131	231.138	17.034	6	76.5	Multiple matches found	DDA for preferred ion	[M+H]+1	1.41096e+08
Isosakuranin	C22 H24 O10	No match	No results	Full match	0.00017	448.137	448.137	449.144	13.164	2	76.5	Single match found	DDA for preferred ion	[M+H]+1	1.32048e+07
Quercetin	C15 H10 O7	Not the top hit	No results	Full match	2e-05	302.043	302.043	301.035	22.565	6	75.9	Multiple matches found	DDA for preferred ion	[M-H]-1	1.40598e+08
Anisic aldehyde	C8 H8 O2	Full match	No results	Full match	8e-05	136.052	136.053	137.06	8.609	2	75.9	Single match found	DDA for preferred ion	[M+H]+1	4.34398e+08
Cafestol	C20 H28 O3	No match	Invalid mass	Invalid mass	-0.00251	316.204	316.201	317.209	18.771	2	75.8	Single match found	DDA for preferred ion	[M+H]+1	2.8011e+09
Isoforsythiaside	C29 H36 O15	No match	No results	Invalid mass	-60.0208	624.205	564.185	609.182	11.866	12	75.8	Multiple matches found	DDA for other ion	[M+FA-H]-1	4.02091e+07
Dehydrodiisoeugenol	C20 H22 O4	No match	No results	Invalid mass	-163.076	326.152	163.076	327.159	15.998	2	75.7	Single match found	DDA for other ion	[2M+H]+1	1.10114e+08
Anisic aldehyde	C8 H8 O2	Full match	No results	Full match	6e-05	136.052	136.052	137.06	8.142	2	75.7	Single match found	DDA for preferred ion	[M+H]+1	4.15666e+08
Sec-O-Glucosylhamaudol	C21 H26 O10	Not the top hit	Partial match	Full match	-0.0002	438.153	438.152	439.16	10.512	2	75.6	Single match found	DDA for preferred ion	[M+H]+1	4.0644e+08
5,7-Dihydroxychromone	C9 H6 O4	Full match	Partial match	Full match	2e-05	178.027	178.027	179.034	9.937	6	75.6	Multiple matches found	DDA for preferred ion	[M+H]+1	1.39444e+08
D(-)-Salicin	C13 H18 O7	No match	No results	Invalid mass	21.9842	286.105	308.089	291.086	9.502	2	75.2	Single match found	DDA for preferred ion	[M+H-H2O]+1	1.21939e+09
Methyl gallate	C8 H8 O5	Full match	No results	Full match	-0.00083	184.037	184.036	183.029	6.476	2	75.1	Single match found	DDA for preferred ion	[M-H]-1	1.5052e+08
Gentiopicrin	C16 H20 O9	Not the top hit	No results	Full match	-9e-05	356.111	356.111	355.103	11.88	2	75	Single match found	DDA for preferred ion	[M-H]-1	3.78562e+08
Anisic aldehyde	C8 H8 O2	Full match	No results	Full match	0	136.052	136.052	137.06	10.684	2	74.9	Single match found	DDA for preferred ion	[M+H]+1	2.29648e+09
Steviol	C20 H30 O3	No match	Invalid mass	Invalid mass	-0.00262	318.219	318.217	319.224	19.307	4	74.8	Multiple matches found	DDA for preferred ion	[M+H]+1	2.22077e+09
Liquiritigenin	C15 H12 O4	Full match	Partial match	Full match	-3e-05	256.074	256.074	257.081	13.932	6	74.4	Multiple matches found	DDA for preferred ion	[M+H]+1	7.67951e+08
Cytosine	C4 H5 N3 O	Full match	No results	Full match	0.0004	111.043	111.044	112.051	1.763	2	74.4	Single match found	DDA for preferred ion	[M+H]+1	7.35687e+07
Eupafolin	C16 H12 O7	Not the top hit	No results	Full match	0.00015	316.058	316.058	315.051	15.471	4	74.4	Multiple matches found	DDA for preferred ion	[M-H]-1	9.08796e+07
Paeonol	C9 H10 O3	No match	No results	Invalid mass	-32.026	166.063	134.037	167.07	7.645	6	74.4	Multiple matches found	DDA for other ion	[M+H+MeOH]+1	3.10566e+08
Cytosine	C4 H5 N3 O	Full match	No results	Full match	0.00037	111.043	111.044	112.051	1.487	2	74.2	Single match found	DDA for preferred ion	[M+H]+1	5.65416e+07
(R)-Mandelic acid	C8 H8 O3	No results	No results	Invalid mass	-0.00114	152.047	152.046	151.039	11.942	4	74.2	Multiple matches found	DDA for preferred ion	[M-H]-1	4.30623e+08
Ginkgolic acid (C	C20 H32 O3	No match	Invalid mass	Invalid mass	-0.00225	320.235	320.233	321.24	19.892	2	74	Single match found	DDA for preferred ion	[M+H]+1	2.69786e+08
Arglabin	C15 H18 O3	Full match	Not the top hit	Full match	2e-05	246.126	246.126	247.133	13.394	2	74	Single match found	DDA for preferred ion	[M+H]+1	1.58736e+08
Morin	C15 H10 O7	Not the top hit	No results	Full match	-4e-05	302.043	302.043	301.035	14.478	6	73.9	Multiple matches found	DDA for preferred ion	[M-H]-1	2.46062e+08
Tinnevellin glucoside	C20 H24 O9	Full match	No results	Full match	-0.00016	408.142	408.142	407.135	14.227	2	73.7	Single match found	DDA for preferred ion	[M-H]-1	2.42361e+09
Ferulaldehyde	C10 H10 O3	Full match	Not the top hit	Full match	-1e-05	178.063	178.063	179.07	9.363	4	73.5	Multiple matches found	DDA for preferred ion	[M+H]+1	1.4449e+09
7-Hydroxycoumarin	C9 H6 O3	Full match	Invalid mass	Full match	-9e-05	162.032	162.032	163.039	9.724	2	73.4	Single match found	DDA for preferred ion	[M+H]+1	2.62519e+09
Abscisic acid	C15 H20 O4	Full match	Partial match	Full match	8e-05	264.136	264.136	263.129	13.692	2	73.4	Single match found	DDA for preferred ion	[M-H]-1	2.26316e+08
Ferulaldehyde	C10 H10 O3	Full match	Not the top hit	Full match	0.00013	178.063	178.063	179.07	3.279	2	73	Single match found	DDA for preferred ion	[M+H]+1	3.20087e+09
Nardosinone	C15 H22 O3	Full match	Partial match	Full match	-8e-05	250.157	250.157	251.164	13.896	2	72.7	Single match found	DDA for preferred ion	[M+H]+1	4.04461e+08
Shikimic acid	C7 H10 O5	No results	No results	Invalid mass	-0.00089	174.053	174.052	173.045	5.952	2	72.3	Single match found	DDA for preferred ion	[M-H]-1	1.01832e+08
5,7-Dihydroxychromone	C9 H6 O4	Full match	No results	Full match	6e-05	178.027	178.027	179.034	12.309	6	72.2	Multiple matches found	DDA for preferred ion	[M+H]+1	6.92565e+07
Norcimifugin	C15 H16 O6	Full match	Invalid mass	Full match	3e-05	292.095	292.095	293.102	14.777	2	72.2	Single match found	DDA for preferred ion	[M+H]+1	2.86765e+08
Isopropyl	C10 H12 O3	Full match	Invalid mass	Full match	0.0001	180.079	180.079	181.086	8.05	4	72	Multiple matches found	DDA for preferred ion	[M+H]+1	5.47216e+08
Fraxetin	C10 H8 O5	Full match	No results	Full match	3e-05	208.037	208.037	241.071	9.191	2	71.9	Single match found	DDA for preferred ion	[M+H+MeOH]+1	1.41143e+08
Triptonide	C20 H22 O6	Full match	Partial match	Full match	-0.00014	358.142	358.142	359.149	14.991	6	71.7	Multiple matches found	DDA for preferred ion	[M+H]+1	1.54528e+08
Fraxinellone	C14 H16 O3	Full match	No results	Full match	0.00013	232.11	232.11	233.117	14.819	2	71.5	Single match found	DDA for preferred ion	[M+H]+1	1.83458e+08
Sinapic acid	C11 H12 O5	No match	Invalid mass	Invalid mass	-32.0262	224.068	192.042	225.076	8.589	2	71.3	Single match found	DDA for other ion	[M+H+MeOH]+1	1.84251e+08
7-Hydroxycoumarin	C9 H6 O3	Full match	Invalid mass	Full match	-6e-05	162.032	162.032	163.039	8.153	2	71.3	Single match found	DDA for preferred ion	[M+H]+1	4.19694e+09
Liquiritin	C21 H22 O9	Not the top hit	Partial match	Full match	7e-05	418.126	418.126	417.119	13.93	4	71.1	Multiple matches found	DDA for preferred ion	[M-H]-1	3.42734e+08
4-Hydroxyisoleucine	C6 H13 N O3	Full match	No results	Full match	0.00013	147.09	147.09	130.086	1.546	2	71.1	Single match found	DDA for preferred ion	[M+H-H2O]+1	3.83453e+08
Quillaic acid	C30 H46 O5	Full match	Invalid mass	Full match	0	486.335	486.335	487.342	18.929	2	71	Single match found	DDA for preferred ion	[M+H]+1	1.24274e+08
Liquiritigenin	C15 H12 O4	Full match	No results	Full match	2e-05	256.074	256.074	289.107	15.144	6	70.8	Multiple matches found	DDA for preferred ion	[M+H+MeOH]+1	1.18533e+08
Aleuritic acid	C16 H32 O5	Not the top hit	No results	Full match	8e-05	304.225	304.225	303.218	15.007	2	70.6	Single match found	DDA for preferred ion	[M-H]-1	9.59365e+07
Alkannin	C16 H16 O5	Full match	Not the top hit	Full match	-2e-05	288.1	288.1	289.107	14.232	4	70.4	Multiple matches found	DDA for preferred ion	[M+H]+1	3.05269e+08
7-Hydroxycoumarin	C9 H6 O3	Full match	Invalid mass	Full match	0.00015	162.032	162.032	163.039	7.629	2	70.3	Single match found	DDA for preferred ion	[M+H]+1	1.16742e+09
Retrochalcone	C16 H14 O4	Full match	Not the top hit	Full match	-7e-05	270.089	270.089	271.096	14.234	8	70.1	Multiple matches found	DDA for preferred ion	[M+H]+1	1.21064e+08
Methyl linoleate	C19 H34 O2	No match	No results	Invalid mass	-32.0262	294.256	262.23	295.263	20.722	2	70.1	Single match found	DDA for other ion	[M+H+MeOH]+1	4.31166e+07
Peucedanol	C14 H16 O5	No match	Invalid mass	Invalid mass	-0.00216	264.1	264.098	265.105	15.244	2	69.5	Single match found	DDA for preferred ion	[M+H]+1	1.861e+07
7-Methoxycoumarin	C10 H8 O3	No match	Unused	Invalid mass	18.0106	176.047	194.058	177.055	12.203	4	69.1	Multiple matches found	DDA for other ion	[M+H-H2O]+1	3.88628e+08
Forsythoside E	C20 H30 O12	No results	No results	Full match	-0.00018	462.174	462.174	521.187	9.077	2	69.1	Single match found	DDA for preferred ion	[M-H+HAc]-1	8.76178e+06
Cantharidin	C10 H12 O4	Full match	Partial match	Full match	-3e-05	196.074	196.074	197.081	12.844	10	69	Multiple matches found	DDA for preferred ion	[M+H]+1	3.41309e+09
Ferulaldehyde	C10 H10 O3	Full match	Not the top hit	Full match	-0.0002	178.063	178.063	179.07	10.796	4	68.5	Multiple matches found	DDA for preferred ion	[M+H]+1	9.67782e+09
Steviol	C20 H30 O3	No match	Invalid mass	Invalid mass	-0.0021	318.219	318.217	319.225	18.386	4	68.4	Multiple matches found	DDA for preferred ion	[M+H]+1	3.07143e+08
Propylparaben	C10 H12 O3	No match	No results	Invalid mass	-46.0067	180.079	134.072	133.065	10.168	2	68	Single match found	DDA for other ion	[M-H]-1	1.70756e+07
Toddalolactone	C16 H20 O6	Full match	Partial match	Full match	-0.00024	308.126	308.126	309.133	11.276	2	67.7	Single match found	DDA for preferred ion	[M+H]+1	1.44251e+08
Demethoxyyangonin	C14 H12 O3	Full match	No results	Full match	0.00022	228.079	228.079	229.086	13.932	4	67.7	Multiple matches found	DDA for preferred ion	[M+H]+1	1.44662e+07
Glycitin	C22 H22 O10	Not the top hit	No results	Full match	0.00151	446.121	446.123	937.244	12.328	2	67.5	Single match found	DDA for preferred ion	[2M+FA-H]-1	1.05453e+08
L-Hydroxyproline L	C5 H9 N O3	Full match	No results	Full match	0.00012	131.058	131.058	132.066	1.576	2	67.1	Single match found	DDA for preferred ion	[M+H]+1	5.57312e+07
Gentiopicrin	C16 H20 O9	Not the top hit	No results	Full match	3e-05	356.111	356.111	339.107	9.495	2	66.6	Single match found	DDA for preferred ion	[M+H-H2O]+1	1.5864e+08
Abscisic acid	C15 H20 O4	Full match	Partial match	Full match	0	264.136	264.136	265.143	15.236	2	66.6	Single match found	DDA for preferred ion	[M+H]+1	9.55869e+08
Hesperidin	C28 H34 O15	No results	No results	Invalid mass	-316.088	610.19	294.102	611.195	12.728	4	66	Multiple matches found	DDA for other ion	[2M+Na]+1	4.55965e+06
Nardosinone	C15 H22 O3	Full match	Not the top hit	Full match	-6e-05	250.157	250.157	251.164	14.391	2	65.8	Single match found	DDA for preferred ion	[M+H]+1	2.00979e+08
3,5-Dimethoxy-4-hydroxybenzaldehyde	C9 H10 O4	Full match	Partial match	Full match	7e-05	182.058	182.058	183.065	11.462	4	65.7	Multiple matches found	DDA for preferred ion	[M+H]+1	2.66855e+08
Peucedanol	C14 H16 O5	No match	Invalid mass	Invalid mass	-0.00259	264.1	264.097	265.104	11.162	2	65.7	Single match found	DDA for preferred ion	[M+H]+1	1.28767e+08
Octyl gallate	C15 H22 O5	Full match	Partial match	Full match	0.0002	282.147	282.147	281.14	14.779	2	65.5	Single match found	DDA for preferred ion	[M-H]-1	1.91498e+08
Scoparone	C11 H10 O4	Full match	No results	Full match	-1e-05	206.058	206.058	207.065	8.591	4	65.3	Multiple matches found	DDA for preferred ion	[M+H]+1	3.48841e+08
Oxysophocarpine	C15 H22 N2 O2	Full match	No results	Full match	0.00013	262.168	262.168	263.176	6.241	2	64.6	Single match found	DDA for preferred ion	[M+H]+1	4.11682e+07
Pinocembrin	C15 H12 O4	Not the top hit	Partial match	Full match	-3e-05	256.074	256.074	257.081	15.999	6	64.4	Multiple matches found	DDA for preferred ion	[M+H]+1	1.10534e+08
Scoparone	C11 H10 O4	Full match	No results	Full match	0	206.058	206.058	207.065	7.779	4	64.4	Multiple matches found	DDA for preferred ion	[M+H]+1	3.48235e+08
Vanillin	C8 H8 O3	Full match	Invalid mass	Full match	7e-05	152.047	152.047	153.055	11.95	8	64	Multiple matches found	DDA for preferred ion	[M+H]+1	3.21846e+08
L-Tyrosine L	C9 H11 N O3	Full match	Full match	Full match	0.00019	181.074	181.074	182.081	2.108	4	63.9	Multiple matches found	DDA for preferred ion	[M+H]+1	4.353e+08
Abscisic acid	C15 H20 O4	Full match	Not the top hit	Full match	0.00014	264.136	264.136	265.144	9.26	2	63.8	Single match found	DDA for preferred ion	[M+H]+1	2.50155e+08
Androsin	C15 H20 O8	No match	Invalid mass	Invalid mass	-63.0086	328.116	265.107	329.123	9.523	2	63.3	Single match found	DDA for other ion	[M+ACN+Na]+1	2.74566e+07
Paeonol	C9 H10 O3	Full match	No results	Full match	-3e-05	166.063	166.063	167.07	10.085	4	63	Multiple matches found	DDA for preferred ion	[M+H]+1	1.6228e+08
Ginkgolide J	C20 H24 O10	No results	No results	Full match	0.00141	424.137	424.138	537.125	13.667	2	63	Single match found	DDA for preferred ion	[M-H+TFA]-1	1.62285e+06
Veratric acid	C9 H10 O4	Full match	Partial match	Full match	0.00015	182.058	182.058	183.065	11.969	6	63	Multiple matches found	DDA for preferred ion	[M+H]+1	2.91972e+08
Shikimic acid	C7 H10 O5	No results	No results	Invalid mass	-0.00092	174.053	174.052	173.045	1.897	2	62.7	Single match found	DDA for preferred ion	[M-H]-1	5.55796e+07
D(-)-Salicin	C13 H18 O7	No match	No results	Invalid mass	21.9841	286.105	308.089	309.097	10.883	2	62.2	Single match found	DDA for preferred ion	[M+H]+1	2.61201e+08
Medicagenic acid	C30 H46 O6	Not the top hit	No results	Full match	0.00071	502.329	502.33	501.323	19.042	2	61.3	Single match found	DDA for preferred ion	[M-H]-1	4.94572e+07
Quillaic acid	C30 H46 O5	Not the top hit	Invalid mass	Full match	-1e-05	486.335	486.335	509.324	20.593	2	61.2	Single match found	DDA for preferred ion	[M+Na]+1	2.25644e+08
Atractylenolide II	C15 H20 O2	Full match	No results	Full match	0	232.146	232.146	233.154	9.159	4	61.1	Multiple matches found	DDA for preferred ion	[M+H]+1	3.40098e+07
Isofraxidin	C11 H10 O5	Full match	Partial match	Full match	-4e-05	222.053	222.053	223.06	9.19	4	60.9	Multiple matches found	DDA for preferred ion	[M+H]+1	1.07356e+08
Tinnevellin glucoside	C20 H24 O9	No match	No results	Invalid mass	-46.0055	408.142	362.137	407.135	14.73	2	60.8	Single match found	DDA for other ion	[M+FA-H]-1	3.77537e+08
D(-)-Salicin	C13 H18 O7	No match	No results	Invalid mass	21.9842	286.105	308.089	309.097	8.395	2	60.5	Single match found	DDA for preferred ion	[M+H]+1	2.73711e+08
Pogostone	C12 H16 O4	Full match	Invalid mass	Full match	-0.00018	224.105	224.105	225.112	14.631	2	60.4	Single match found	DDA for preferred ion	[M+H]+1	7.17459e+08
Isopropyl	C10 H12 O3	Full match	Invalid mass	Full match	8e-05	180.079	180.079	181.086	10.484	2	60.4	Single match found	DDA for preferred ion	[M+H]+1	1.6609e+08
Acetylvanillin	C10 H10 O4	Full match	Not the top hit	Full match	0.00016	194.058	194.058	195.065	13.979	6	60.1	Multiple matches found	DDA for preferred ion	[M+H]+1	2.04712e+08
Nepodin	C13 H12 O3	Full match	No results	Full match	0.00017	216.079	216.079	217.086	16.432	2	60.1	Single match found	DDA for preferred ion	[M+H]+1	3.15282e+07
Linderane	C15 H16 O4	Full match	Not the top hit	Full match	2e-05	260.105	260.105	261.112	17.23	4	60	Multiple matches found	DDA for preferred ion	[M+H]+1	9.51726e+07
Naringenin chalcone	C15 H12 O5	Full match	No results	Full match	-0.0001	272.068	272.068	273.076	9.052	4	59.9	Multiple matches found	DDA for preferred ion	[M+H]+1	7.39067e+07
Aucubin	C15 H22 O9	No match	Invalid mass	Invalid mass	46.0057	346.126	392.132	391.125	7.66	4	59.8	Multiple matches found	DDA for preferred ion	[M-H]-1	2.74288e+07
Cephalotaxine	C18 H21 N O4	No results	No results	Invalid mass	-178.087	315.147	137.06	316.154	15.947	2	59.5	Single match found	DDA for other ion	[2M+ACN+H]+1	3.31185e+07
7-Demethylsuberosin	C14 H14 O3	Full match	No results	Full match	0.00014	230.094	230.094	231.102	15.091	6	59.3	Multiple matches found	DDA for preferred ion	[M+H]+1	2.45839e+07
Quillaic acid	C30 H46 O5	Not the top hit	Invalid mass	Full match	2e-05	486.335	486.335	469.331	19.213	2	58.7	Single match found	DDA for preferred ion	[M+H-H2O]+1	1.57867e+08
Isoforsythiaside	C29 H36 O15	No match	No results	Full match	0.00028	624.205	624.206	623.198	12.225	12	58.6	Multiple matches found	DDA for preferred ion	[M-H]-1	1.8096e+07
L(+)-Leucinol L	C6 H15 N O	Full match	No results	Full match	0.0002	117.115	117.116	118.123	1.63	2	58.3	Single match found	DDA for preferred ion	[M+H]+1	1.07471e+07
Hastatoside	C17 H24 O11	No match	No results	Full match	-0.00012	404.132	404.132	449.13	8.582	2	57.6	Single match found	DDA for other ion	[M+FA-H]-1	1.05937e+09
Ethyl	C12 H14 O3	Full match	Partial match	Full match	4e-05	206.094	206.094	207.102	12.008	4	57.4	Multiple matches found	DDA for preferred ion	[M+H]+1	2.14783e+08
Homoplantaginin	C22 H22 O11	No match	No results	Invalid mass	-113.992	462.116	348.124	461.109	12.762	6	57.4	Multiple matches found	DDA for other ion	[M-H+TFA]-1	2.31833e+08
Suberosin	C15 H16 O3	No match	No results	Invalid mass	-0.03631	244.11	244.074	245.081	16.971	2	57	Single match found	DDA for preferred ion	[M+H]+1	9.1603e+06
Cinnamic acid	C9 H8 O2	Full match	No results	Full match	2e-05	148.052	148.052	149.06	10.84	2	57	Single match found	DDA for preferred ion	[M+H]+1	3.07379e+08
Isorhamnetin	C28 H32 O16	Not the top hit	Full match	Full match	-1e-05	624.169	624.169	623.162	12.403	4	56.5	Multiple matches found	DDA for preferred ion	[M-H]-1	2.79145e+08
6-Shogaol	C17 H24 O3	Full match	Invalid mass	Full match	-7e-05	276.173	276.172	277.18	16.778	2	56.4	Single match found	DDA for preferred ion	[M+H]+1	1.92191e+08
Coniferin	C16 H22 O8	No match	Invalid mass	Invalid mass	17.0262	342.131	359.158	360.165	9.091	2	55.6	Single match found	DDA for preferred ion	[M+H]+1	3.73688e+08
5-Hydroxy-6,7-dimethoxylflavone	C17 H14 O5	Full match	Not the top hit	Full match	6e-05	298.084	298.084	299.091	15.192	2	55.4	Single match found	DDA for preferred ion	[M+H]+1	9.70363e+07
Ethyl	C12 H14 O3	Full match	Partial match	Full match	6e-05	206.094	206.094	207.102	13.011	4	54.8	Multiple matches found	DDA for preferred ion	[M+H]+1	3.741e+08
Spiculisporic acid	C17 H28 O6	Not the top hit	No results	Full match	3e-05	328.189	328.189	373.187	15.37	2	54.7	Single match found	DDA for preferred ion	[M+FA-H]-1	4.03889e+07
Neohesperidin	C28 H34 O15	No match	No results	Invalid mass	-46.0048	610.19	564.185	609.182	12.062	4	54.7	Multiple matches found	DDA for other ion	[M+FA-H]-1	3.11205e+07
Scopolamine butylbromide		No match	No results	Invalid mass			359.205	360.213	7.984	2	54.3	Single match found	DDA for preferred ion	[M+H]+1	8.2169e+07
Isosinensetin	C20 H20 O7	No match	No results	Invalid mass	-32.0265	372.121	340.094	373.128	11.823	6	53.8	Multiple matches found	DDA for other ion	[M+H+MeOH]+1	8.80875e+07
Dehydrodiisoeugenol	C20 H22 O4	No match	Invalid mass	Invalid mass	-32.0263	326.152	294.126	327.159	12.997	2	53.8	Single match found	DDA for other ion	[M+H+MeOH]+1	1.45269e+08
Secoxyloganin	C17 H24 O11	No match	No results	Full match	0.00052	404.132	404.132	403.125	10.906	6	53.2	Multiple matches found	DDA for preferred ion	[M-H]-1	8.32072e+07
Eriodictyol	C15 H12 O6	Full match	No results	Full match	0.00012	288.063	288.063	287.056	12.714	2	52.3	Single match found	DDA for preferred ion	[M-H]-1	2.80635e+08
Geniposide	C17 H24 O10	No match	Invalid mass	Full match	0	388.137	388.137	387.13	11.8	2	52	Single match found	DDA for preferred ion	[M-H]-1	7.17315e+07
Sinensetin	C20 H20 O7	Not the top hit	No results	Full match	-0.00019	372.121	372.121	373.128	14.231	6	51.9	Multiple matches found	DDA for preferred ion	[M+H]+1	1.09329e+08
Cryptotanshinone	C19 H20 O3	No match	Invalid mass	Invalid mass	-0.00231	296.141	296.139	297.146	17.672	2	51.5	Single match found	DDA for preferred ion	[M+H]+1	6.98931e+07
Cryptotanshinone	C19 H20 O3	Not the top hit	Partial match	Full match	-5e-05	296.141	296.141	297.149	18.58	2	51.5	Single match found	DDA for preferred ion	[M+H]+1	1.63601e+07
Salidroside	C14 H20 O7	Not the top hit	No results	Full match	-4e-05	300.121	300.121	318.155	8.496	2	51.1	Single match found	DDA for preferred ion	[M+NH4]+1	2.00887e+08
Jaceosidin	C17 H14 O7	Not the top hit	Partial match	Full match	-0.00012	330.074	330.074	331.081	11.932	6	51.1	Multiple matches found	DDA for preferred ion	[M+H]+1	1.96784e+08
Skimmin	C15 H16 O8	Not the top hit	No results	Full match	-0.00018	324.085	324.084	325.092	9.461	2	51.1	Single match found	DDA for preferred ion	[M+H]+1	1.17045e+08
Homoplantaginin	C22 H22 O11	No match	No results	Full match	0.00029	462.116	462.116	461.109	12.097	4	50.9	Multiple matches found	DDA for preferred ion	[M-H]-1	2.35374e+08
(+)-Usniacin	C18 H16 O7	Not the top hit	No results	Full match	0.00013	344.09	344.09	343.082	14.155	8	50.7	Multiple matches found	DDA for preferred ion	[M-H]-1	6.92271e+07
4-Methoxysalicylic acid	C8 H8 O4	No results	Invalid mass	Invalid mass	-0.00103	168.042	168.041	167.034	12.88	4	50.7	Multiple matches found	DDA for preferred ion	[M-H]-1	9.61389e+07
Loganic acid	C16 H24 O10	Not the top hit	No results	Full match	-7e-05	376.137	376.137	421.135	3.294	2	50.6	Single match found	DDA for preferred ion	[M+FA-H]-1	3.76031e+09
Helicid	C13 H16 O7	Not the top hit	No results	Full match	3e-05	284.09	284.09	329.088	10.494	2	50.3	Single match found	DDA for other ion	[M+FA-H]-1	9.27029e+07
Isopropyl	C10 H12 O3	Full match	Invalid mass	Full match	5e-05	180.079	180.079	181.086	13.044	2	49.9	Single match found	DDA for preferred ion	[M+H]+1	4.98224e+08
Protosappanin B	C16 H16 O6	Invalid mass	No results	Invalid mass	-60.0209	304.095	244.074	243.066	11.829	2	49.8	Single match found	DDA for other ion	[M-H]-1	2.49187e+06
Xanthoxyline	C10 H12 O4	Full match	Partial match	Full match	0.00013	196.074	196.074	197.081	13.36	10	49.7	Multiple matches found	DDA for preferred ion	[M+H]+1	6.03656e+08
Flavokawain B	C17 H16 O4	Full match	No results	Full match	-7e-05	284.105	284.105	285.112	14.638	2	49.7	Single match found	DDA for preferred ion	[M+H]+1	9.52929e+07
Genistein	C15 H10 O5	Not the top hit	Partial match	Full match	5e-05	270.053	270.053	271.06	16.656	10	49.5	Multiple matches found	DDA for preferred ion	[M+H]+1	1.02813e+08
Senkyunolide A	C12 H16 O2	Full match	No results	Full match	0.00021	192.115	192.115	193.123	18.387	2	49	Single match found	DDA for preferred ion	[M+H]+1	7.98339e+07
Phloretin	C15 H14 O5	Full match	No results	Full match	0.00036	274.084	274.084	273.077	20.394	2	49	Single match found	DDA for preferred ion	[M-H]-1	4.40941e+07
Calceolarioside B	C23 H26 O11	No match	No results	Full match	0.0001	478.148	478.148	477.14	11.579	2	48.7	Single match found	DDA for preferred ion	[M-H]-1	2.18183e+08
Mitraphylline	C21 H24 N2 O4	Not the top hit	Partial match	Full match	-0.00071	368.174	368.173	369.18	18.042	4	48.6	Multiple matches found	DDA for preferred ion	[M+H]+1	1.15532e+08
Dehydrotrametenolic acid	C30 H46 O3	Full match	No results	Full match	4e-05	454.345	454.345	455.352	16.44	12	48.4	Multiple matches found	DDA for preferred ion	[M+H]+1	2.92973e+07
Propylparaben	C10 H12 O3	No match	No results	Invalid mass	-0.00092	180.079	180.078	179.07	12.505	2	48.1	Single match found	DDA for preferred ion	[M-H]-1	2.71283e+07
Methyl hexadecanoate	C17 H34 O2	No match	No results	Invalid mass	46.0054	270.256	316.261	339.25	18.921	2	47.9	Single match found	DDA for preferred ion	[M+Na]+1	3.17899e+08
Pectolinarigenin	C17 H14 O6	Not the top hit	Partial match	Full match	0	314.079	314.079	315.086	17.15	2	47.4	Single match found	DDA for preferred ion	[M+H]+1	6.61705e+07
18 β-Glycyrrhetintic Acid	C30 H46 O4	Not the top hit	No results	Full match	0.00025	470.34	470.34	469.333	19.902	2	47.4	Single match found	DDA for preferred ion	[M-H]-1	2.81619e+07
Astilbin	C21 H22 O11	No match	No results	Full match	5e-05	450.116	450.116	449.109	11.617	4	47.3	Multiple matches found	DDA for preferred ion	[M-H]-1	1.06156e+08
Bilobalide	C15 H18 O8	Not the top hit	No results	Full match	-3e-05	326.1	326.1	325.093	9.491	2	47.3	Single match found	DDA for preferred ion	[M-H]-1	4.16344e+08
Geniposide	C17 H24 O10	No match	No results	Full match	0.00055	388.137	388.137	387.13	10.503	2	47.1	Single match found	DDA for preferred ion	[M-H]-1	5.59448e+07
Picroside II	C23 H28 O13	No match	No results	Full match	-0.00024	512.153	512.153	511.145	9.589	2	46.7	Single match found	DDA for preferred ion	[M-H]-1	6.1446e+07
Piperine	C17 H19 N O3	Full match	Full match	Full match	3e-05	285.136	285.137	286.144	8.543	2	46.6	Single match found	DDA for preferred ion	[M+H]+1	1.05354e+08
Quercetin	C21 H20 O11	No match	No results	Full match	0.00029	448.101	448.101	493.099	15.025	14	46.3	Multiple matches found	DDA for preferred ion	[M+FA-H]-1	8.17509e+07
Alisol C	C32 H48 O6	No match	No results	Invalid mass	-0.00282	528.345	528.342	529.35	23.143	2	46.1	Single match found	DDA for preferred ion	[M+H]+1	3.66749e+07
Sophocarpine	C15 H22 N2 O	Full match	No results	Full match	-2e-05	246.173	246.173	247.18	5.886	2	45.9	Single match found	DDA for preferred ion	[M+H]+1	2.29824e+08
Homoplantaginin	C22 H22 O11	Not the top hit	No results	Full match	0.00014	462.116	462.116	461.109	13.057	2	45.9	Single match found	DDA for preferred ion	[M-H]-1	1.63717e+09
Phloridzin	C21 H24 O10	No match	No results	Invalid mass	-32.0264	436.137	404.111	437.144	10.305	4	45.7	Multiple matches found	DDA for other ion	[M+H+MeOH]+1	1.4734e+08
Citropten	C11 H10 O4	No match	No results	Invalid mass	-32.0261	206.058	174.032	207.065	11.976	4	45.7	Multiple matches found	DDA for other ion	[M+H+MeOH]+1	7.23675e+07
Paeonol	C9 H10 O3	Full match	No results	Full match	3e-05	166.063	166.063	167.07	11.238	4	45.4	Multiple matches found	DDA for preferred ion	[M+H]+1	5.44865e+08
Scutellarin methyl ester	C22 H20 O12	No match	No results	Full match	0.00027	476.095	476.096	475.088	13.962	2	44.9	Single match found	DDA for preferred ion	[M-H]-1	2.01358e+08
Propylparaben	C10 H12 O3	No match	No results	Invalid mass	-46.0065	180.079	134.072	179.07	13.366	2	44.9	Single match found	DDA for other ion	[M+FA-H]-1	3.49016e+07
Clareolide	C16 H26 O2	Full match	No results	Full match	0	250.193	250.193	251.201	15.007	2	44.7	Single match found	DDA for preferred ion	[M+H]+1	1.03759e+08
Pogostone	C12 H16 O4	Full match	Invalid mass	Full match	-6e-05	224.105	224.105	225.112	11.635	2	44.3	Single match found	DDA for preferred ion	[M+H]+1	8.76332e+08
Pogostone	C12 H16 O4	Full match	Invalid mass	Full match	-0.00019	224.105	224.105	225.112	12.79	2	44.1	Single match found	DDA for preferred ion	[M+H]+1	2.35806e+09
Agarotetrol	C17 H18 O6	Not the top hit	No results	Full match	0	318.11	318.11	319.118	10.473	2	44.1	Single match found	DDA for preferred ion	[M+H]+1	1.39521e+08
Melittoside	C21 H32 O15	No match	No results	Invalid mass	-60.0212	524.174	464.153	523.167	3.328	2	43.7	Single match found	DDA for other ion	[M-H+HAc]-1	3.51276e+08
3-Butylidenephthalide	C12 H12 O2	Full match	No results	Full match	8e-05	188.084	188.084	189.091	10.547	2	43.6	Single match found	DDA for preferred ion	[M+H]+1	3.76915e+07
Sarracenin	C11 H14 O5	Full match	No results	Full match	2e-05	226.084	226.084	227.091	10.403	2	43.5	Single match found	DDA for preferred ion	[M+H]+1	7.81741e+07
Pogostone	C12 H16 O4	Full match	Invalid mass	Full match	-0.00027	224.105	224.105	225.112	11.163	2	43.4	Single match found	DDA for preferred ion	[M+H]+1	4.89893e+09
5-Hydroxy-1-tetralone	C10 H10 O2	Full match	No results	Full match	4e-05	162.068	162.068	163.075	18.019	2	43.3	Single match found	DDA for preferred ion	[M+H]+1	1.21538e+09
Actidione	C15 H23 N O4	Full match	Full match	Full match	0.00012	281.163	281.163	282.17	6.276	2	43.2	Single match found	DDA for preferred ion	[M+H]+1	3.69887e+08
Neohesperidin	C28 H34 O15	No match	No results	Invalid mass	-46.0054	610.19	564.184	609.183	12.723	2	42.9	Single match found	DDA for other ion	[M+FA-H]-1	4.34041e+07
Citropten	C11 H10 O4	Full match	No results	Full match	3e-05	206.058	206.058	207.065	12.495	4	42.9	Multiple matches found	DDA for preferred ion	[M+H]+1	1.33152e+08
Dehydroandrographolide	C20 H28 O4	No match	Invalid mass	Invalid mass	-0.00258	332.199	332.196	333.203	17.599	2	42.8	Single match found	DDA for preferred ion	[M+H]+1	1.55652e+09
Dimethylcurcumin	C23 H24 O6	No results	No results	Invalid mass	-0.00371	396.157	396.154	397.161	9.563	4	42.8	Multiple matches found	DDA for preferred ion	[M+H]+1	2.19309e+06
8-O-Acetylharpagide	C17 H26 O11	No match	No results	Invalid mass	-46.0053	406.148	360.142	405.14	4.203	2	42.6	Single match found	DDA for other ion	[M+FA-H]-1	1.57604e+08
Aurantio-obtusin β-D-glucoside	C23 H24 O12	Full match	No results	Full match	-2e-05	492.127	492.127	493.134	11.93	2	42.6	Single match found	DDA for preferred ion	[M+H]+1	1.97414e+08
Swertiamarin	C16 H22 O10	No match	No results	Invalid mass	46.0055	374.121	420.127	419.12	9.178	2	42.4	Single match found	DDA for preferred ion	[M-H]-1	6.10644e+08
Cinnamic acid	C9 H8 O2	Full match	No results	Full match	-7e-05	148.052	148.052	181.086	15.719	2	42.1	Single match found	DDA for preferred ion	[M+H+MeOH]+1	4.72134e+08
5,7,3'-Trihydroxy-6,4',5'-trimethoxyflavone	C18 H16 O8	No match	Invalid mass	Invalid mass	0.00351	360.085	360.088	359.081	14.409	4	41.8	Multiple matches found	DDA for preferred ion	[M-H]-1	9.25573e+07
Engeletin	C21 H22 O10	No match	No results	Invalid mass	-240.064	434.121	194.058	177.055	11.869	2	41.7	Single match found	DDA for other ion	[M+H-H2O]+1	1.66025e+08
Isorhamnetin	C28 H32 O16	No match	Invalid mass	Invalid mass	-46.0055	624.169	578.163	623.162	12.862	4	41.5	Multiple matches found	DDA for other ion	[M+FA-H]-1	2.13028e+08
S-(-)-Carbidopa	C10 H14 N2 O4	Full match	No results	Full match	2e-05	226.095	226.095	227.103	6.583	2	41.3	Single match found	DDA for preferred ion	[M+H]+1	2.84857e+08
Wedelolactone	C16 H10 O7	Full match	No results	Full match	0.00018	314.043	314.043	313.036	16.449	2	41.3	Single match found	DDA for preferred ion	[M-H]-1	2.51761e+09
4',7-Di-O-methylnaringenin	C17 H16 O5	Full match	No results	Full match	-2e-05	300.1	300.1	301.107	12.785	6	41.2	Multiple matches found	DDA for preferred ion	[M+H]+1	1.57858e+08
Pterostilbene	C16 H16 O3	No results	No results	Invalid mass	-0.00241	256.11	256.108	257.115	15.405	2	40.7	Single match found	DDA for preferred ion	[M+H]+1	6.84104e+06
Pogostone	C12 H16 O4	No match	Invalid mass	Invalid mass	-32.0263	224.105	192.079	225.112	23.695	2	40.5	Single match found	DDA for other ion	[M+H+MeOH]+1	2.59699e+08
Ethyl ferulate	C12 H14 O4	Full match	No results	Full match	0.00029	222.089	222.089	264.123	9.144	2	40.2	Single match found	DDA for preferred ion	[M+ACN+H]+1	6.66469e+07
Isobergapten	C12 H8 O4	Full match	Invalid mass	Full match	3e-05	216.042	216.042	217.05	11.426	6	40	Multiple matches found	DDA for preferred ion	[M+H]+1	4.61604e+07
Kurarinone	C26 H30 O6	No match	Invalid mass	Invalid mass	-21.9846	438.204	416.22	439.209	18.857	2	39.8	Single match found	DDA for other ion	[M+Na]+1	9.92967e+07
Tanshinone IIA	C19 H18 O3	Not the top hit	No results	Full match	0.00032	294.126	294.126	317.115	19.549	2	39.7	Single match found	DDA for preferred ion	[M+Na]+1	5.66005e+06
Glycitin	C22 H22 O10	Not the top hit	No results	Full match	0.00011	446.121	446.121	445.114	15.889	2	39.6	Single match found	DDA for preferred ion	[M-H]-1	1.83682e+08
Bulleyaconi cine A	C35 H49 N O9	No match	No results	Invalid mass	627.344	627.341	1254.68	628.35	11.816	2	39.6	Single match found	DDA for other ion	[M+2H]+2	2.48366e+08
Bayogenin	C30 H48 O5	Full match	Partial match	Full match	0.00063	488.35	488.351	487.343	16.935	4	39.3	Multiple matches found	DDA for preferred ion	[M-H]-1	6.87278e+06
8-Prenylnaringenin	C20 H20 O5	Not the top hit	No results	Full match	-0.00011	340.131	340.131	341.138	16.122	2	39.3	Single match found	DDA for preferred ion	[M+H]+1	4.24481e+07
Glabrone	C20 H16 O5	No match	No results	Invalid mass	0.00335	336.1	336.103	335.096	16.352	2	38.8	Single match found	DDA for preferred ion	[M-H]-1	1.51837e+08
Gomisin J	C22 H28 O6	Not the top hit	No results	Full match	-0.0003	388.189	388.188	389.196	14.876	2	38.6	Single match found	DDA for preferred ion	[M+H]+1	2.52832e+08
Propyl gallate	C10 H12 O5	Full match	No results	Full match	-0.00057	212.068	212.068	211.061	6.504	2	38.2	Single match found	DDA for preferred ion	[M-H]-1	7.54535e+07
Oxypeucedanin hydrate	C16 H16 O6	No match	No results	Invalid mass	18.0104	304.095	322.105	323.112	1.648	4	38.2	Multiple matches found	DDA for other ion	[M+H]+1	1.6135e+07
Geniposidic acid	C16 H22 O10	Not the top hit	No results	Full match	-0.0001	374.121	374.121	373.114	7.762	2	37.9	Single match found	DDA for preferred ion	[M-H]-1	3.90798e+07
Bengenin	C14 H16 O9	Not the top hit	No results	Full match	-7e-05	328.079	328.079	327.072	10.02	2	37.2	Single match found	DDA for preferred ion	[M-H]-1	1.32883e+08
Bengenin	C14 H16 O9	Not the top hit	No results	Full match	-4e-05	328.079	328.079	327.072	9.514	2	37	Single match found	DDA for preferred ion	[M-H]-1	7.08758e+08
Dihydromethysticin	C15 H16 O5	Full match	Partial match	Full match	-7e-05	276.1	276.1	277.107	12.847	2	37	Single match found	DDA for preferred ion	[M+H]+1	5.01734e+08
Biochanin A	C16 H12 O5	Full match	No results	Full match	7e-05	284.068	284.069	285.076	17.119	10	36.5	Multiple matches found	DDA for preferred ion	[M+H]+1	2.18184e+08
Gardenoside	C17 H24 O11	Not the top hit	No results	Full match	-0.00018	404.132	404.132	403.124	7.092	4	36.2	Multiple matches found	DDA for preferred ion	[M-H]-1	3.7722e+08
Isorhapontigenin	C15 H14 O4	Full match	No results	Full match	8e-05	258.089	258.089	259.097	16.534	4	35.3	Multiple matches found	DDA for preferred ion	[M+H]+1	5.84213e+07
Rotenone	C23 H22 O6	No match	No results	Invalid mass	-197.073	394.142	197.069	198.076	9.439	2	35.1	Single match found	DDA for other ion	[M+H]+1	3.67147e+07
Harpagoside	C24 H30 O11	No match	No results	Invalid mass	-46.0052	494.179	448.174	493.172	14.135	2	35.1	Single match found	DDA for other ion	[M+FA-H]-1	1.31931e+08
Isobutyl	C11 H14 O3	Full match	Invalid mass	Full match	8e-05	194.094	194.094	195.102	10.445	2	35	Single match found	DDA for preferred ion	[M+H]+1	2.77e+08
Bilobalide	C15 H18 O8	Not the top hit	No results	Full match	5e-05	326.1	326.1	325.093	8.018	2	35	Single match found	DDA for preferred ion	[M-H]-1	6.09494e+07
Fraxetin	C10 H8 O5	Full match	No results	Full match	-0.0001	208.037	208.037	253.035	8.977	2	34.4	Single match found	DDA for preferred ion	[M+FA-H]-1	2.64482e+08
Shanzhiside methyl ester	C17 H26 O11	Invalid mass	No results	Invalid mass	-10.0419	406.148	396.106	397.113	8.936	2	34	Single match found	DDA for other ion	[M+H]+1	8.03679e+06
Shanzhiside methyl ester	C17 H26 O11	No results	No results	Full match	0.00186	406.148	406.149	429.139	8.429	2	34	Single match found	DDA for other ion	[M+Na]+1	5.11166e+06
Calceolarioside B	C23 H26 O11	No match	No results	Invalid mass	17.0264	478.148	495.174	479.155	9.364	2	34	Single match found	DDA for other ion	[M+H-NH3]+1	4.15594e+08
Schisandrin C	C22 H24 O6	Not the top hit	No results	Full match	-0.00061	384.157	384.157	385.164	16.286	2	33.9	Single match found	DDA for preferred ion	[M+H]+1	6.93553e+07
Kushenol F	C25 H28 O6	No match	No results	Invalid mass	-0.0026	424.189	424.186	425.193	18.771	2	33.7	Single match found	DDA for preferred ion	[M+H]+1	3.3035e+07
Isomangiferin	C19 H18 O11	No match	No results	Invalid mass	-230.022	422.085	192.063	234.097	1.612	2	33.7	Single match found	DDA for other ion	[M+ACN+H]+1	3.26865e+08
Bruceine A	C26 H34 O11	No results	No results	Full match	-1e-05	522.21	522.21	521.203	15.322	2	33.6	Single match found	DDA for preferred ion	[M-H]-1	1.53445e+06
Melittoside	C21 H32 O15	No match	No results	Invalid mass	-0.00586	524.174	524.168	525.175	15.214	2	33.5	Single match found	DDA for preferred ion	[M+H]+1	4.27617e+07
8-O-Acetylharpagide	C17 H26 O11	Not the top hit	No results	Full match	2e-05	406.148	406.148	405.14	4.424	2	32.9	Single match found	DDA for preferred ion	[M-H]-1	1.39015e+08
Norcimifugin	C15 H16 O6	Full match	Invalid mass	Full match	-9e-05	292.095	292.095	293.102	13.058	2	32.8	Single match found	DDA for preferred ion	[M+H]+1	1.11351e+09
Isomucronulatol	C23 H28 O10	Full match	No results	Full match	0.00016	464.168	464.168	482.202	13.287	2	32.7	Single match found	DDA for preferred ion	[M+NH4]+1	4.53251e+07
Orsellinic acid	C8 H8 O4	Full match	No results	Full match	0	168.042	168.042	169.05	10.488	2	32.3	Single match found	DDA for preferred ion	[M+H]+1	1.05313e+08
Deoxyandrographolide	C20 H30 O4	No match	Invalid mass	Invalid mass	-0.00245	334.214	334.212	335.219	19.665	2	32.3	Single match found	DDA for preferred ion	[M+H]+1	9.97867e+07
Isomeranzin	C15 H16 O4	Full match	Partial match	Full match	-0.00019	260.105	260.105	261.112	15.788	4	32.3	Multiple matches found	DDA for preferred ion	[M+H]+1	3.46967e+08
Harmine HCl	C13 H12 N2 O	No match	No results	Full match	4e-05	212.095	212.095	245.128	8.18	2	32.1	Single match found	DDA for preferred ion	[M+H+MeOH]+1	8.5346e+06
Kushenol F	C25 H28 O6	No match	No match	Invalid mass	-21.9845	424.189	402.204	425.193	18.179	2	32	Single match found	DDA for other ion	[M+Na]+1	1.07945e+08
Carnosol	C20 H26 O4	Not the top hit	No results	Full match	-1e-05	330.183	330.183	375.181	15.666	2	32	Single match found	DDA for preferred ion	[M+FA-H]-1	2.18415e+07
(-)-Scopolamine hydrochloride	C17 H21 N O4	Full match	No results	Full match	-1e-05	303.147	303.147	304.154	17.222	6	31.8	Multiple matches found	DDA for preferred ion	[M+H]+1	8.87732e+07
Bilobalide	C15 H18 O8	Not the top hit	No results	Full match	-6e-05	326.1	326.1	325.093	8.407	2	31.5	Single match found	DDA for preferred ion	[M-H]-1	3.29419e+08
7-Ethylcamptothecin	C22 H20 N2 O4	No match	No results	Invalid mass	-0.00466	376.142	376.138	377.145	10.969	2	31.4	Single match found	DDA for preferred ion	[M+H]+1	2.33427e+08
Loureirin A	C17 H18 O4	No match	Invalid mass	Invalid mass	-0.00214	286.121	286.118	287.126	13.674	2	31.2	Single match found	DDA for preferred ion	[M+H]+1	1.89521e+08
(+)-Catechin hydrate	C15 H14 O6	Not the top hit	No results	Full match	0.00011	290.079	290.079	291.086	15.318	2	31.2	Single match found	DDA for preferred ion	[M+H]+1	6.64161e+07
Isomucronulatol	C23 H28 O10	Not the top hit	No results	Full match	-0.00011	464.168	464.168	465.175	12.645	2	31.2	Single match found	DDA for preferred ion	[M+H]+1	4.76221e+07
Atractyloside A	C21 H36 O10	No match	Invalid mass	Invalid mass	17.0267	448.231	465.257	466.265	15.03	2	30.9	Single match found	DDA for preferred ion	[M+H]+1	7.8055e+08
Propyl gallate	C10 H12 O5	Full match	No results	Full match	-0.00017	212.068	212.068	213.076	7.842	2	30.6	Single match found	DDA for preferred ion	[M+H]+1	1.91695e+08
Orcinol gentiobioside	C19 H28 O12	No match	No results	Invalid mass	-46.0055	448.158	402.153	447.151	10.048	2	30.6	Single match found	DDA for other ion	[M+FA-H]-1	1.27992e+08
Bruceine A	C26 H34 O11	No match	No results	Full match	-6e-05	522.21	522.21	523.217	14.679	2	30.5	Single match found	DDA for preferred ion	[M+H]+1	2.04356e+07
Methysticin	C15 H14 O5	Full match	No results	Full match	-0.00012	274.084	274.084	275.091	10.15	2	30.4	Single match found	DDA for preferred ion	[M+H]+1	4.3857e+07
