# Supplementary material
Source: Research Square preprint supplement (doi:10.21203/rs.3.rs-8434231/v1)
Supplement: Supplementary file 2 [file 41c100a950206f2a385b993c.xlsx]

## Sheet: Sheet1
Primer name	Primer Sequence (5′to 3′)	Product Length (bp)	Species
R-FTH1 -F	CGCCAGAACTACCACCAGGACT	184	Rats
R-FTH1 -R	TCAGTTTCTCAGCATGTTCCCTC
R-Necap2-F	TGAAGCAGCAGTGCGAGTTTG	104	Rats
R-Necap2-R	TGCGATGTTGATCTTGATGGTCT
R-Prdx2-F	CCAGATCACAGTCAACGACCTACC	155	Rats
R-Prdx2-R	TGCTGTCATCCACATTGGGTTT
R-GAPDH-F	CTGGAGAAACCTGCCAAGTATG	138	Rats
R-GAPDH-R	GGTGGAAGAATGGGAGTTGCT
