# Supplementary material
Source: Research Square preprint supplement (doi:10.21203/rs.3.rs-8434231/v1)
Supplement: Supplementary file 3 [file 42309f259a222e195b31745e.xlsx]

## Sheet: Sheet1
Names of Images	Positive Cells, %	Positive Cells Density, number/mm²	Mean Density	H-Score	IRS
Control FTH1	0.0158	66	0.1112	3.07	0
JDHYG FTH1	0.0423	220	0.1098	8.11	0
ALF FTH1	0.1983	731	0.1105	38.75	2
Control NECAP2	0.0686	201	0.0952	10.31	2
JDHYG NECAP2	0.1577	724	0.0898	24.11	2
ALF NECAP2	0.6561	2388	0.0886	124.2	6
Control PRDX2	0.0154	63	0.1013	3.06	0
JDHYG PRDX2	0.0318	156	0.107	6.18	0
ALF PRDX2	0.5756	2137	0.1003	113.33	6
