# Supplementary material
Source: Research Square preprint supplement (doi:10.21203/rs.3.rs-8434231/v1)
Supplement: Supplementary file 4 [file 512edb76aa012b887a30a936.xlsx]

## Sheet: Table S1
Gene ID	Mapped IDs	Gene Name	PANTHER Family/Subfamily	PANTHER Protein Class
RAT|RGD=2635|UniProtKB=P19132	Fth1	Ferritin heavy chain	FERRITIN HEAVY CHAIN (PTHR11431:SF37)	storage protein
RAT|RGD=1359532|UniProtKB=Q5FVR5	Acnat2	Acyl-coenzyme A amino acid N-acyltransferase 2	ACYL-COENZYME A AMINO ACID N-ACYLTRANSFERASE 1-RELATED (PTHR10824:SF1)	esterase
RAT|RGD=620469|UniProtKB=Q9WVC0	Septin7	Septin-7	SEPTIN-7 (PTHR18884:SF129)	cytoskeletal protein
RAT|RGD=1308370|UniProtKB=D4A081	Setdb1	SET domain bifurcated histone lysine methyltransferase 1	HISTONE-LYSINE N-METHYLTRANSFERASE SETDB1 (PTHR46024:SF2)	histone modifying enzyme
RAT|RGD=68339|UniProtKB=Q9Z122	Fads2	Acyl-CoA 6-desaturase	ACYL-COA 6-DESATURASE (PTHR19353:SF12)	oxidoreductase
RAT|RGD=2603|UniProtKB=P06399	Fga	Fibrinogen alpha chain	FIBRINOGEN ALPHA CHAIN (PTHR47221:SF3)	-
RAT|RGD=621760|UniProtKB=Q05961	Oas1a	2'-5'-oligoadenylate synthase 1A	2'-5'-OLIGOADENYLATE SYNTHASE 1 (PTHR11258:SF13)	nucleotidyltransferase
RAT|RGD=735063|UniProtKB=Q6P756	Necap2	Adaptin ear-binding coat-associated protein 2	ADAPTIN EAR-BINDING COAT-ASSOCIATED PROTEIN 2 (PTHR12847:SF16)	ATP-binding cassette (ABC) transporter
RAT|RGD=708533|UniProtKB=Q9JIR1	Rbp2	RIMS-binding protein 2	RIMS-BINDING PROTEIN 2 (PTHR14234:SF18)	scaffold/adaptor protein
RAT|RGD=621103|UniProtKB=O70454	Bud31	Protein BUD31 homolog	PROTEIN BUD31 HOMOLOG (PTHR19411:SF0)	RNA splicing factor
RAT|RGD=70896|UniProtKB=P16303	Ces1d	Carboxylesterase 1D	LIVER CARBOXYLESTERASE 1-RELATED (PTHR11559:SF179)	esterase
RAT|RGD=11458713|UniProtKB=A0A8I6GD94	Igkvl-ps2	Ig-like domain-containing protein	IG KAPPA CHAIN V-V REGION MOPC 149-RELATED (PTHR23267:SF215)	immunoglobulin
RAT|RGD=621515|UniProtKB=P61954	Gng11	Guanine nucleotide-binding protein G(I)_G(S)_G(O) subunit gamma-11	GUANINE NUCLEOTIDE-BINDING PROTEIN G(I)_G(S)_G(O) SUBUNIT GAMMA-11 (PTHR13809:SF1)	heterotrimeric G-protein
RAT|RGD=41075263|UniProtKB=A0A8I5Y7P7	Igkvl-ps6	Immunoglobulin V-set domain-containing protein	IMMUNOGLOBULIN KAPPA VARIABLE 1-33-RELATED (PTHR23267:SF355)	immunoglobulin
RAT|RGD=631370|UniProtKB=P55006	Rdh7	Retinol dehydrogenase 7	RETINOL DEHYDROGENASE 16 (PTHR43313:SF11)	dehydrogenase
RAT|RGD=3838|UniProtKB=P35704	Prdx2	Peroxiredoxin-2	PEROXIREDOXIN-2 (PTHR10681:SF161)	peroxidase
RAT|RGD=41394010|UniProtKB=A0A8I5ZUB4	Rpl37	Ribosomal protein L37	60S RIBOSOMAL PROTEIN L37-RELATED (PTHR10768:SF42)	ribosomal protein
RAT|RGD=3757|UniProtKB=P24008	Srd5a1	3-oxo-5-alpha-steroid 4-dehydrogenase 1	3-OXO-5-ALPHA-STEROID 4-DEHYDROGENASE 1 (PTHR10556:SF57)	dehydrogenase
RAT|RGD=3544|UniProtKB=P06768	Rbp2	Retinol-binding protein 2	RETINOL-BINDING PROTEIN 2 (PTHR11955:SF59)	transfer/carrier protein
RAT|RGD=621678|UniProtKB=Q920R3	Fads1	Acyl-CoA (8-3)-desaturase	ACYL-COA (8-3)-DESATURASE (PTHR19353:SF57)	oxidoreductase
RAT|RGD=1305720|UniProtKB=P20761	Igh-1a	Ig gamma-2B chain C region	IG GAMMA-2A CHAIN C REGION SECRETED FORM-RELATED (PTHR23411:SF28)	immunoglobulin receptor superfamily
RAT|RGD=621204|UniProtKB=P61928	Rpl37	Large ribosomal subunit protein eL37	LARGE RIBOSOMAL SUBUNIT PROTEIN EL37 (PTHR10768:SF22)	ribosomal protein
