# Supplementary material
Source: Research Square preprint supplement (doi:10.21203/rs.3.rs-8434231/v1)
Supplement: Supplementary file 5 [file 5a223ab90730e42bceaec333.docx]

Cell experiment WB antibody information：

| Manufacturer | Catalog Number | Antibibody Name |
| --- | --- | --- |
| abcam | ab75972 | FTH1 |
| proteintech | 15899-1-AF | NECAP2 |
| abcam | ab109367 | Prdx2 |
| CST | 4970L | β-Actin |

Information on WB Antibodies for Animal Experiments：

| Manufacturer | Catalog Number | Antibibody Name |
| --- | --- | --- |
| Servicebio | GB112933-100 | FTH1 |
| Proteintech | 15899-1-AP | NECAP2 |
| Proteintech | 10545-2-AP | Prdx2 |
| Servicebio | GB15001 | ACTIN |
